# Supplementary material
Source: PubMed Central journal article supplement (PMC1183549)
Supplement: pnas_0502103102_1.pdf [file pnas_0502103102_1.pdf]

Ralstonia metallidurans gi|48771323|ZP\_00275665 406aa (Betaproteobacteria)  
>Ralmet Betaproteobacteria  
-----MLSAASRPYIDASVPLVRE-----HGLAITTHFYREMFARPELRKI---FNMG-----NQANGSQQQSLASAVFYAANI---DRADVLPVVERIVHKKHVAVG---L---TPAHYPIVGKYLLEIAAIVLGDAA---TPPLLAAWDEAYWLLAGELIAAEARLYERHGV-----  
Ralstonia solanacearum gi|17548115|NP\_521517 401aa (Betaproteobacteria)  
-----MLSEQSKPLIDASVPLVRE-----HGLITITQTFYRNFASHPELTNL---FNMG-----NQANGSQQQSLASAVFYAANH---GNNALAPVVGRIVHKKHAAGV---I---RPSHYPIVGRHLLGAIAEVLGDAA---TPPELLAAWDEAYWLLAEELIAAEARLYAHTQS-----  
>Ralool Betaproteobacteria  
-----MLSEQSKPLIDASVPLVRE-----HGLITITQTFYRNFASHPELTNL---FNMG-----NQANGSQQQSLASAVFYAANH---GNNALAPVVGRIVHKKHAAGV---I---RPSHYPIVGRHLLGAIAEVLGDAA---TPPELLAAWDEAYWLLAEELIAAEARLYAHTQS-----  
Salmonella typhimurium gi|16765876|NP\_461491 396aa (Gammaproteobacteria)  
>Saltyg Gammaproteobacteria  
-----MLDAGTATYKATIPLLVE-----TGPKLTAHFYDRMFTHNPELKEI---FNMS-----NQRNGDQREALFNAIAYASNI---ENLPALLPAVEKIAQKHTSFQ---I---KPEQYNIVGHLLATLDEMFPN---GQEVLDAGKAYGVLANVFIHREAIYHENAS-----  
Sinorhizobium meliloti gi|16263102|NP\_435895 403aa (Alphaproteobacteria)  
-----MLTQRTKRDIVKATAPVLAQ-----HGYAIIQHFYKRMFQAHPELKNI---FNMA-----HQERGEQQQALARAVYAYAANI---ENPELSAVLKDIAHKHASLG---V---RPEQYPIVGEHLLASIKEVLGDAA---TDEIISAWAQYGNLADILAGMESELYERSEE-----  
>Simmel Alphaproteobacteria  
-----MLTQRTKRDIVKATAPVLAQ-----HGYAIIQHFYKRMFQAHPELKNI---FNMA-----HQERGEQQQALARAVYAYAANI---ENPELSAVLKDIAHKHASLG---V---RPEQYPIVGEHLLASIKEVLGDAA---TDEIISAWAQYGNLADILAGMESELYERSEE-----  
Staphylococcus aureus gi|15923230|NP\_370764 381aa (Firmicutes)  
-----MLTEQEKDIIKQTVPLLKE-----GTEITSIFYPKMFKAHPPELLNM---FNQT-----NQKRGMSALLAQVMAAAVNI---DNLSVIKPIVIMVAYKHCAIQ---V---YAEHYPIVGENLKAIQDVTGLEE---HDPVIQAKAKAYGVIAADVFIQIEKIDYQGMW-----  
>Staur Firmicutes  
-----MLTEQEKDIIKQTVPLLKE-----GTEITSIFYPKMFKAHPPELLNM---FNQT-----NQKRGMSALLAQVMAAAVNI---DNLSVIKPIVIMVAYKHCAIQ---V---YAEHYPIVGENLKAIQDVTGLEE---HDPVIQAKAKAYGVIAADVFIQIEKIDYQGMW-----  
>Staepl Firmicutes  
-----MLTEQEKDIIKQTVPLLQD-----KQTEITSIFYPKMFKAHPPELLNM---FNQT-----NQKRGMSALLAQVLAAMNI---NNGLAIKPIVIMVAYKHCAIQ---V---YAEHYPIVGENLKAIQDVTGLEE---HDPVIQAKAKAYGVIAADVFIQIEKIDYQGMW-----  
Streptomyces avermitilis gi|29832496|NP\_827130 400aa (Actinobacteria)  
>Stravel Actinobacteria  
-----MLSEQAATVRATLPAVGA-----AVGEITARFYDRFLAARPELLRDL---FNRG-----NQAAGTQRQALAGSIAAFATYL---VEHPDERPDAMLDRIAHKHASLG---I---APGQYAVVHEHLFAAIAEVLGDAV---TPEVAAAWDEVYWMANALIAIERRLYAQHEN-----  
Streptomyces avermitilis gi|29830819|NP\_825453 565aa (Actinobacteria)  
-----PEASPDAVILRRITMAEAVGP-----VAGKVTSSYFALLFVRHPELRSI---F---PAAMDQRDRLLKALLTAAEHI---DNTEVLVAYLQNGRGRHK---Y---GTRPEHPYAVGECILGALSRYASGIW---DEETEAAWVRAYTTISQVIMDAAAADDELRAFA-----  
>Strave2 Actinobacteria  
-----PEASPDAVILRRITMAEAVGP-----VAGKVTSSYFALLFVRHPELRSI---F---PAAMDQRDRLLKALLTAAEHI---DNTEVLVAYLQNGRGRHK---Y---GTRPEHPYAVGECILGALSRYASGIW---DEETEAAWVRAYTTISQVIMDAAAADDELRAFA-----  
Streptomyces coelicolor gi|21218667|NP\_624446 435aa (Actinobacteria)  
>Strcoe1 Actinobacteria  
-----SVTDEDVALVRASLTVVTP-----HVSELAHFYSILFSRYQVRDL---F---PAELDVQRERLVRALLRIVELV---DDPDNLVAFCSRIGRGRHK---F---GTQSGHYPAVGECLLQALSHFAGFAW---HPALATAWQRAYTAAADVMVRAAEEADARSFA-----  
Streptomyces coelicolor gi|21225376|NP\_631155 403aa (Actinobacteria)  
>Strcoe2 Actinobacteria  
-----MLSQSAQIVRDLTLPVGA-----SLGTTIDLFYRMRFEERPELLRDL---FNRA-----NQASGVQREALAGAVAAFATAL---VKHPDERPDVGLRIANHASLG---I---TSDQYTLVGRHLLAAVAEVLGDAV---TPAVAAAWDEVYWMANALIAEAMLYARSQV-----  
Streptomyces coelicolor gi|21225698|NP\_631477 398aa (Actinobacteria)  
>Strcoe3 Actinobacteria  
-----MLSEQSPVVRATLPAVGA-----ATGDI AALFYKRLFDAPPELLRDL---FNRG-----NQANGEQQRALAGSVAAPAGLL---LENPDERADVLSRISHKHASLG---I---TPDQYTVHRRHMAAVDVLGDAV---TPEVARAWDEVYWMANALIAEARLYTEKGV-----  
Thermobifida fusca gi|4883571|ZP\_0002715 394aa (Actinobacteria)  
>Thefus Actinobacteria  
-----MLSTQSDIVRATLPPVGA-----HLDEITSRFYTMFSERPELLDGL---FNRG-----NQANGEQQRALAGSIAAGFASAL---LANPDERPDALLARIAHKAHAVA---V---TDDQYVIVKHVLEGAIVLGDAA---TPEVIAAWDEVYWMGGALIAEARLYAEKNA-----  
Vibrio cholerae gi|15600953|NP\_232583 394aa (Gammaproteobacteria)  
>Vibcho Gammaproteobacteria  
-----MLTQEHINIIKSTIPLES-----AGPALTQHFYQRMFSHNPELKHII---FNMT-----HQKTRGRQSVLFEAIAAYAKHI---DNLAALTSVERIAHKHTSFN---I---QPEHYQIVGHLLLETRELAPDAF---TQPVEEAWTAAYFFLAQVFDREAGALYLERKQ-----  
Vibrio parahaemolyticus gi|28899583|NP\_799188 394aa (Gammaproteobacteria)  
>Vibpar Gammaproteobacteria  
-----MLSNQITIVKATAPLAEET-----GPKLTAHFYDRMFTHNPELKDI---FNMS-----NQRNGDQREALFNAI CAYANI---ENLPALLGAVEKIAHKHTSFLL---I---TKDQYQIVGKHLIATIDELFNP---GQEVLDAAWAEYGVLANVFIQREQIYQNAS-----  
Vibrio vulnificus gi|27364701|NP\_760229 394aa (Gammaproteobacteria)  
>Vibvul Gammaproteobacteria  
-----MLSENTINIVKSTAPLAEET-----GPKLTAHFYDRMFTHNPELKDI---FNMS-----NQRNGDQREALFNAI CAYASNI---DNLPALLGAVEKIAHKHTSFLL---I---TADQYQIVGSHLLATIDELFSP---GQAVLDAAWAEYGVLANVFIQREQIYQDNQS-----  
Xylella fastidiosa gi|15836658|NP\_297346 397aa (Gammaproteobacteria)  
>Xylfas Gammaproteobacteria  
-----SFSPHPIIKSTVPLLAE-----HGTTIIEAMYHRLFD-PQIEAL---FNQA-----NQRNGTQIHALGAILAYARNI---DNPGVLAERIAQKHVGYA---I---HPEHYPHVATALLGAIKVLGDVA---TSEVLEAWGEAYWFIANLLKDREAVIREGIMT-----  
Yersinia pestis gi|16123099|NP\_406412 396aa (Gammaproteobacteria)  
>Yerpes Gammaproteobacteria  
-----MLDQTIIVKSTIPLLAA-----TGPKLTAHFYDRMFTHNPELKNII---FNMS-----NQRNGDQREALFNAI CAYATNI---ENLALALLPVERIAQKHTSLN---I---QPEHYPIVGEHLIATIDELFSP---GQAVLDAAWAEYGVLANVFIQRESIQYQSET-----

Bacterial SDGs

\*Acinetobacter sp. ADP1 gi|50086221|YP\_047731 254aa (1-141) (Gammaproteobacteria)  
>Acinet\* Gammaproteobacteria  
-----MTPQQLVKSTVPLVRE-----HGVTLSYFYRMLNHPPELKNV---FNLD-----HQSTGRQPRALAAVLAAYAEHI---EQPEKLAKAVERITTKHVSIN---I---QPEQYAVGENLLHSISEVLNVFF---ESELIEAWKQAYLQLADILIEVEKEYHQYLAQ-----  
>Aquifex aeolicus gi|15605769|NP\_213146 139aa (1-137) (Aquificales)  
>Aqaeo\* Aquificales  
-----MLSEETIRIVKSTVPLLKE-----HGTEITARMYELLF SKYPKPKEL---F---AGASEEQPKLANAIIAYATI---DRLDNAISTARSHVRRN---V---KPEHYPLVKELLLQAEIVLNP---GEEVLKAWEEAYDFLAKTLITLLEKLYSQP-----  
>Bradyrhizobium japonicum gi|27377918|NP\_769447 142aa (Alphaproteobacteria)  
>Bradjap1\* Alphaproteobacteria  
-----MTEPEITLQKQSFQKAVP-----ISETAAVLFYDRFLFEVAPSVRAM---F---PEDMTEQRKMLMGLAAVVGGL---SNLDSILPAASALAKRHVA---Y---GAKAEHYPVVGGATLWLEKLGEEA---WTPELATAWTDAYGLVSGYMISEAYQAQAAE-----  
>Bradyrhizobium japonicum gi|27379994|NP\_771523 139aa (Alphaproteobacteria)  
>Bradjap2\* Alphaproteobacteria  
-----TMTATISFNPIEQSFERAAS-----RCADLTPLVYRRLFDHEPETRAM---F---RSQSELVKGSMLALT---I---EALIDFAGTRSGHFLRIA---CEV---VSHDAYGTPRELFIAFFAVIRDTRLRDLGDA---WSAIEAQWDTLLTDIEAYVTVPA-----  
>Campylobacter jejuni gi|15792891|NP\_282714 140aa (Epsilonproteobacteria)  
>Camjej\* Epsilonproteobacteria  
-----MTKQEQIILKDCVPLQK-----NGEDLTNEFYKMFNDYPEVKPM---FNME-----KQISGEQPKALAMAILMAAKNI---ENLERNMRSFVKVVAITHVNLG---V---KEEHYPVIGACLLKAIKLNLPDE---ATLKAEVAYGKIAYFIDIEKLYDK-----  
>Campylobacter coli gi|32527608|AAP86201.1 142aa  
>Camcol\* Epsilonproteobacteria  
-----mtqeqgiikdcvplqk-----ngedltkefykimfndyvevcpm---fnme-----kqasgeqpkalamailmaakni---enlernmrsfvkvaithvnlk---v---keehypviggacilkaikevlyade---ttlkaweeankiaqfyidiekiyakak-----  
>Chromobacterium violaceum gi|34498391| 148aa (Betaproteobacteria)  
>Chrvio2\* Betaproteobacteria  
-----PLTQQQIRLVQESFAKVEP-----IADDEAAKLFYDKLFYAPDLRPL---F---KKDMAAQQRMLMSTLKLAVKGL---DDEQLTTPVLRKLAQRHVDYG---V---KPGDYTPVGNALLWTKQGLGEAS---WTQELRAAWVDAFRIMATVMKQAAYPEIQFIQD-----  
>Clostridium perfringens gi|18310935|NP\_562869 144aa (Firmicutes)  
>Cloper\* Firmicutes  
-----MLDQKTDIIKSTVPLVKS-----NGLEITKTFYKMFQNPVVKPL---FNMI---KQESEQPKALAMAILAQAONI---DNLEAIKPVVNRIGVHCNAC---V---QPEHYPIVGHKLLGAIKEVLGDGA---TEDIINAWAKTYGVAEVIINNEKEMYASR-----  
>Desulfobacterium hafniense gi|23119439|ZP\_00102525 267aa (Firmicutes)  
>Deshaf\* Firmicutes  
-----ALNEAAAVVRAVTPALAA-----HGHAVTAMRYRRLFRDE-RIAL---FNHAN-----QGGDNAQAHLAGAILAYAQHI---DDLPAISGALERIAQKHVGYH---I---LPEHYPFVAGALLGAIEETLGEAA---TPQVLAWGEAYWFLADLQRREARLGEAQ-----  
>Gloeobacter violaceus gi|37521141|NP\_924518 142aa (Cyanobacteria)  
>Glovio\*  
-----TAMALQVKLLEQSFGEKVP-----NAHAFASFDNLSDFPQTAL---FA---HSDMQAQKQLLASLVLVVENL---RQPQVLSLALQDLGNRHGAC---I---VPEHYPMVGTSLKTFETYLGDAN---TPEVQAWVDAYGAIITGLMLTGAES-----  
>Hosnoc punctiforme gi|23129187|ref|ZP\_00111020.1| 126aa (Cyanobacteria)  
>Nosup\* Cyanobacteria  
-----MYEIMQNFHPEVKEQ---F---FMSA-----AQADGSPARLATAVYANQI---DNLPALKSMVEKIAHRHVQTH---V---TPEQYPIVGESELLQAMKQVLEGEA---TEEVMAWTEAYQALSEVFIHREDIYVGEDK-----  
>Novosphingobium aromaticivorans gi|23110290|ZP\_00096448 148aa (Alphaproteobacteria)  
>Novaro\* Alphaproteobacteria  
-----IASEHAKTIVKATAPAEK-----HGVDITAMYKRLQND-EVKAM---FDQA-----AQDSGEQPRRLAGAILAYAKNI---DKLENLSAVQRMVQRHVDTG---V---KAEHYPVVAELLPALRDLVLEGEA---TDEVLAAWGEAYWMLADILIAEKQAYLEAVA-----  
>Photobacterium profundum gi|46915547|CAG22319.1 133 aa (Gammaproteobacteria)  
>Photpro Gammaproteobacteria

MDIHEVFNDSYTRCNR--NPHEMPLFYERFLEKDETFRSM--F-----THVDMENQMKMIKASLLIIMLAA-----TSEQARATVKFKGRHRGPDG--L-----GIKPLDIDLWFECFLDITIKCEDPA-----YNSQVEQAWRQCFNEGITIMKAECKS-----  
>Pirellula sp.1 gi|32471656|ref|NP\_864649.166aa (Planctomycetes)  
>Pirell\* Planctomycetes  
\*Pseudomonas aeruginosa gi|15599162|ref|NP\_252656.130aa (Gammaproteobacteria)  
>Pseae\* Gammaproteobacteria  
\*Rhodospseudomonas palustris gi|3993677|NP\_949047.141aa (Alphaproteobacteria)  
>Rhopal\* Alphaproteobacteria  
\*Rhodospseudomonas palustris gi|22960924|ZP\_00008530.146aa (Alphaproteobacteria)  
>Rhopal2\* Alphaproteobacteria  
\*Silicibacter gi|52009457|ZP\_00336820.143aa (Alphaproteobacteria)  
>Silici Alphaproteobacteria  
\*Thermobifida fusca gi|48835900|ZP\_00292898.177aa (Actinobacteria)  
>Thefus\* Actinobacteria  
\*Vibrio parahaemolyticus gi|28900962|NP\_800617.142aa (Gammaproteobacteria)  
>Vibar\* Gammaaproteobacteria  
\*Vitreoscilla stercoraria gi|70622|pir||GGZLB|70622.146aa (Betaproteobacteria)  
>Vitste\* Betaproteobacteria  
-----MLDQQTINIKAIVPVLKE-----HGVITITTFYKNFLAKHPEVRPL--FDMG-----RQESLEQPKALAMTVLAAQNI-----ENLPAILPAVKKIAVKHCQAG--V-----AAAHYPIVGQELLGAIKEVLGDA--TDDILDAWGKAYGVIAVDFIQVEADLYAQAVE-----

Eukaryote FHbs

Aspergillus nidulans gi|40739893|gb|EAA59083|AN3522.2.410aa (Ascomycota; Pezizomycotina)  
>Aspnid1 Ascomycota; Pezizomycotina  
Aspergillus nidulans gi|40742233|gb|EAA61421|AN7169.2.426aa (Ascomycota; Pezizomycotina)  
>Aspnid2 Ascomycota; Pezizomycotina  
Candida albicans >gi|46432319|EAK91807.1.398aa also EAK91821.1 GI:46432334 (Ascomycota; Saccharomycotina)  
>Canalb1 Ascomycota; Saccharomycotina  
Candida albicans gi|46432322|EAK91810.1.400aa (Ascomycota; Saccharomycotina)  
>Canalb2 Ascomycota; Saccharomycotina  
Candida albicans gi|46441212|EAL00511.1.400aa (Ascomycota; Saccharomycotina)  
>Canalb3 Ascomycota; Saccharomycotina  
Candida albicans gi|46433276|EAK92722.1.563aa (region 300-430) (Ascomycota; Saccharomycotina)  
>Canalb4 Ascomycota; Saccharomycotina  
Candida glabrata gi|50291201|XP\_448033.1.432aa (124-264) (Ascomycota; Saccharomycotina)  
>Cangla1 Ascomycota; Saccharomycotina  
Candida glabrata gi|50293309|XP\_449066.398aa (Ascomycota; Saccharomycotina)  
>Cangla2 Ascomycota; Saccharomycotina  
Cryptococcus neoformans gi|50259618|EAL22289.1.504aa (Basidiomycota; Hymenomycetes)  
>Cryneo Basidiomycota  
Debaromyces hansenii gi|50428015|XP\_462620.1.403aa (Ascomycota; Saccharomycotina)  
>Debhan1 Ascomycota; Saccharomycotina  
Debaromyces hansenii gi|50304451|XP\_452175.1.395aa (Ascomycota; Saccharomycotina)  
>Debhan2 Ascomycota; Saccharomycotina  
Debaromyces hansenii gi|50428041|XP\_462633.1.401aa (Ascomycota; Saccharomycotina)  
>Debhan3 Ascomycota; Saccharomycotina  
Dictyostelium discoideum gi|5821408|BAA83810 (Mycetozoa)  
>Dicdis1 Mycetozoa  
Dictyostelium discoideum gi|5821410|BAA83811 (Mycetozoa)  
>Dicdis2 Mycetozoa  
Eremothecium gossypii gi|45185029|NP\_982746.1.436aa (181-330) (Ascomycota; Saccharomycotina)  
>Eregos Ascomycota; Saccharomycotina  
Fusarium oxysporum gi|3551511|BAA33011.415aa (Ascomycota; Pezizomycotina)  
>Fusoxy Ascomycota; Saccharomycotina  
Giardia lamblia (intestinalis) gi|27981493|458aa (Diplomonadida)  
>Gialam Diplomonadida  
Giberella zeae gi|3551511|EAA73242.415aa (Ascomycota; Pezizomycotina)  
>Gibzeal Ascomycota; Pezizomycotina  
Giberella zeae gi|42547868|EAA70711.457aa (Ascomycota; Pezizomycotina)  
>Gibzeal2 Ascomycota; Pezizomycotina  
Kluyveromyces lactis gi|50304451|XP\_452175.1.395aa (Ascomycota; Saccharomycotina)  
>Klulac1 Ascomycota; Saccharomycotina  
Kluyveromyces lactis gi|50307891|XP\_453939.430aa (181-319) (Ascomycota; Saccharomycotina)  
>Klulac2 Ascomycota; Saccharomycotina  
Magnaporthe grisea gi|38101598|EAA48540.447aa (Ascomycota; Pezizomycotina)

>Magri Ascomycota; Pezizomycotina  
SITPEQVAVVKSTAPVLKE-----HGVTITTFYKNMIDAHPELHNV---FSTT-----SQATGAQPRALASAVLAYATHI-----DDLRLSHAVSRIAHKVSLH---I---TPDQYDIVGKYLIEAQVGLGDA-----TPEIVAIAAYAGVLADVFIVGEGKMYQEHSD  
Neurospora crassa gi|28919225|EAA28703 418aa (Ascomycota; Pezizomycotina)  
>Neural Ascomycota; Pezizomycotina  
PLDQAQISIVKSTAPVLKQ-----HGEALITTFYFNLDITENPSLKI---FSLT-----SQATGAQPRALAHAVLAYATYI-----DNLSALSEAVARIAHKVSLQ---V---EPAQYAIYVQYLIQAIQVGLGDA-----TPEIVDAWTAAYGVLANVFIGVEGGMYEENEK  
Neurospora crassa gi|28925744|EAA34752 537aa (Ascomycota; Pezizomycotina)  
>Neura2 Ascomycota; Pezizomycotina  
ALTYQSKLVRDTIPALKE-----HGERITSIFYKTMLDHPELNNY---FNSV-----NQKNGRQPRALTAIVLGFASNI-----NHLSELVFKFERMCKHCSLQ---I---QPEHYEVGKYLIQAFGEVLGPAM-----TPEVQTAWTAKYWMKLMIGREAGLYRDFES  
Fichia norvegensis gi|417109|Q0331 388aa (Ascomycota; Saccharomycotina)  
>Picnor Ascomycota; Saccharomycotina  
VPLTPEINFLQSLAPVVKKE-----HGVTITTFYKMYFQTYPEVRSY---FNMT-----NQKTGRQPKVAFSLYQYILHL-----NDLTFISGFVQIVLKHGCLG---I---KPDQYFVVGESLQVAFKRMVLGEEA-----DEHFVEVFKYAGNLAQTLIDAEASVYKTLAW  
Saccharomyces cerevisiae gi|1362285|S57699|FHP\_YEAST 399aa (Ascomycota; Saccharomycotina)  
>Saccr1 Ascomycota; Saccharomycotina  
MLAEKTRSIKATVPVLEQ-----GQVTITRTFYKMLTEHTELLNI---FNRT-----NQKVGQAQNALATTVLAAAKNI-----DDLVLMDHVVKQIGHKRALQ---I---KPEHYPIVGEYLLKAIKEVLGDA-----TPEIINANGAYQAIADIFITVEKMYEEALW  
Saccharomyces cerevisiae gi|6324095|NP\_014165.1 426aa (Ascomycota; Saccharomycotina)  
>Saccr2 Ascomycota; Saccharomycotina  
APDGMISKTIDPTARPKTKQRDNDNKVDLFCFSQFYDNLIAMDPLEEY---F-----PSLKHQVAVSFCKVLDASIDNL-----ENVHVLDDYIVKLGKRHSRLG---I---KTVGFVEMKGFAMTTLQDRFGSFL-----TLELKNLWGLQVLYLANCMITAGDKPMEKIQP  
Schizosaccharomyces pombe gi|19115929|NC003424 427aa (Ascomycota; Schizosaccharomycetes)  
>Schpom1 Ascomycota; Schizosaccharomycetes  
ELNESQKQYIRSSIPILEY-----SGVNLTKAFYQKMLGNYPEVLVY---FNKA-----HQISLSQPRILAFALLNYAKNI-----DDLTSLSAFMDQIVVHVGLQ---I---KAEHYPIVGHCLSTMQELLPSDVA-----TPAFLEAWTAYGNLAKILIDSEKKVYQSQPW  
Yarrowia lipolytica gi|50548235|XP\_502088 374aa (Ascomycota; Saccharomycotina)  
>Yarlip1 Ascomycota; Saccharomycotina  
MLTDAQIKIINDSAPFLAE-----NGTDFAKMYKYMFATVPEVIRF---FNQS-----DQKNLQPKILAHALVAYASNI-----DNLGVLSDVVEQIVVHVGLQ---I---QPEQYPIVAASIIHTLKEMLGEEA-----TPEFIEAWTAVYQLANILDAEKLKYEKQAS  
Yarrowia lipolytica gi|50550817|XP\_502881 463aa (186-321) (Ascomycota; Saccharomycotina)  
>Yarlip2 Ascomycota; Saccharomycotina  
LMSDPESELQSTAYGFT-----ALFCEQFYTNLMASHAELASI---F-----PSIKRQSVAVAGVGLAISL-----ERIEEMDFLRSVGRKRNRM-----I---GVEPIHYRWLGEAMVKTADFRRGDF-----TLEVETAWIKIYSYLAHLKLSADEEPNVLMA  
Yarrowia lipolytica gi|50543406|XP\_499869 471aa (193-329) (Ascomycota; Saccharomycotina)  
>Yarlip3 Ascomycota; Saccharomycotina  
LMDPELLESAAAYGFT-----ALFCEQFYTNLMASHAELTSI---F-----PSIKRQSVAVAGVGLAISL-----DHIEKLEDFLRSVGRKRNRM-----I---GVEPIHYRWLGEAMIKTADFRRGDSF-----TLEMETAWIKIYSYLANLKADEEPNVLMA  
Cyanidioschyzon merolae CMR319C (Rhodophyte)  
>Cyanmer  
EPQESIAIVQSTWSQAVQ-----CERLRLQVYDRFLALYPELQPM---F-----RSDPALQRILRDMVDAQVRLK-----NSRRDLQALRDLGKRHVK-----Y---GTQEEQYPIVGENLLHALESILGSKHF-----SEDMRKAWLDVYAYWSSVMLEGAREAQ  
Thalassiosira pseudonana 120695 (Stramenopiles; Bacillariophytes)  
>Thapsel  
GLSPEDLSLVQKSWAKVVF-----IASVAADLFYTKLFELDPRLPL---F-----PSDLADQKMLMAMI SVAVDGL-----TDLEALVPAVQDLGRRHAKY-----Y---KVTAPMFDVGAALDITLQKLGEGW-----DEEHKEAWTLVYGVL  
Bacterial 2/2Hbs  
Gemmata obscuriglobus (Planctomycete) 2/2Hb1  
>Gemobs  
LMDRLGG-----ESVVKAVVHDFALAALED-PRKN---FTRG-----GRYKPSAAALEKSIIVDMI SDVSGGP-----FKYSGSKMKEAKGMA-----I---TDAEFDALAVHLVSLKRF-----KVADPEIAELVKVVA  
Haloarcula marismortui (Euryarcheota) gi|55379358|YP\_137208 120aa 2/2Hb1  
>Halmar  
MASQSFPERIGG-----RDAVAVVSDFYDRVRDD-PLLEPY---FEET-----DMDQLRSHQQFISTVAGGP-----VDYDGDMDTAHEGMG-----I---TEDAFASVATHLEAALRANGVP-----DDDVEAILTEVAAMKDDIVEA  
Hypomonas neptunium (Alphaproteobacteria) 2/2Hb1  
>Hypnep  
LYEVFGG-----EAGVSRIVDDLVERSIND-PRIDAI---FAAS-----DLVRLRRLTKQFCFILAGE-----CDYTGMDMASSHHDHG-----I---TNREFNALVENLQHAMNAESVFF-----RAQNKLLAALPMQRDVVT  
Legionella pneumophila (Gammaproteobacteria) gi|53752322|CAH13754 124aa 2/2Hb1  
>Legpne  
MTESLERLGG-----QNAVNTAVDIFYRKMMD-RVNYF---FDDV-----DMEQQILKQKGLTFMVFGGP-----NQYTKGSMREHGHL-----L---ARGLNDSHVDIVIEHGLTKELGANEE-----DIQKVAALANSYRGDVLGRSS  
Microbulbifer degradans (Gammaproteobacteria) gi|4886128|ZP\_00315184 2/2Hb1  
>Micdegl  
CSSLQGNQTLKQLGG-----QDGVSAITRQLINMADN-RIAPR---FRGV-----NIGKFGTLDTYLSITDGG-----CVYGSDSITIHSGYN-----Y---TATEFNALVENLQAMETLQIPT-----ATQNKLLAKLAPSYQDVVYQ  
Mycobacterium avium (Actinobacteria) (HbN) 131aa 2/2Hb1  
>Mycavil  
ILARFRKAEPASIIDRIGG-----HEALEVVVDFYVRVLAD-QLSGF---FTGT-----NMNRLKKGQVEFFAALGGP-----HPYTGAPMKQVHQGRG-----I---TMHFGVLVAGHLADALTAAGVPS-----ETVSEILGAIAPLAPEIATGEA  
Mycobacterium bovis (Actinobacteria) gi|31618318|NP\_855221 136aa (HbN) 2/2Hb1  
>Mychov1  
LSRLRKRREPISYDKIGG-----HEALEVVVDFYVRVLAD-QLSAF---FSGT-----NMSRLKKGQVEFFAALGGP-----EPYTGAPMKQVHQGRG-----I---TMHFGVLVAGHLADALTAAGVPS-----ETITEILGVIAPLAVDVTSGESTTAPV  
Mycobacterium marinum (Actinobacteria) 136aa (HbN) 2/2Hb1  
>Mycmar1  
LSRFRKRAPVSIYDKIGG-----YEAIEAVVDFYVRVLAD-QLGGF---FTGT-----NMNRLKKGQVEFFAALGGP-----EPYTGAPMKQVHQGRG-----I---TMAHFLVAGHLGDSLTAAGVPS-----ETVTDILKVLAPLATDIASGETTATG  
Mycobacterium paratuberculosis (Actinobacteria) 120aa 2/2Hb1  
>Mycpar1  
ILARFRKAEPASIIDRIGG-----HEALEVVVDFYVRVLAD-QLSGF---FTGT-----NMNRLKKGQVEFFAALGGP-----HPYTGAPMKQVHQGRG-----I---TMHFGVLVAGHLADALTAAGVPS-----ETVSEILGAIAPLAPEIATGEA  
Mycobacterium smegmatis (Actinobacteria) (HbN) 125aa 2/2Hb1  
>Mycsm1  
MYSIEYIGG-----AEALEVVVDFYVRVLAD-ELAGF---FTGT-----NMSRLKGRQVEFFATALGGP-----DEYTGAPMRQVHQGRG-----I---TMHFGVLVAGHLGDSALAMPG-----ATTSQIIAIAIAPLAPEIATARTA  
Mycobacterium tuberculosis (Actinobacteria) gi|15608680|NP\_216058 HbN 136aa 2/2Hb1  
>Myc tub1  
LSRLRKRREPISYDKIGG-----HEALEVVVDFYVRVLAD-QLSAF---FSGT-----NMSRLKKGQVEFFAALGGP-----EPYTGAPMKQVHQGRG-----I---TMHFGVLVAGHLADALTAAGVPS-----ETITEILGVIAPLAVDVTSGESTTAPV  
Nostoc punctiforme (Cyanobacteria) gi|23126739|ZP\_00108627 159aa 2/2Hb1  
>Nospun1  
MSTLYDNIGG-----QPAIEQVVDLHKRIAD-SLLSPT---FAGT-----DMAQRNHLVAFLGQIFEGP-----KQYGGPRMDKTHAG-----I---NLQQPHFDAIAKHLGEAMVARGVSAE-----NTKAALDRVTNMKGAILNK  
Nostoc punctiforme (Cyanobacteria) gi|23126739|ZP\_00108627 159aa 2/2Hb1  
>Nospun2  
AHSAGSSLYKRLGG-----YNAIAAVIDSAKNIFAD-PLIGKY---FIGL-----STNSKQRLRELLIAQFCQAAGP-----CIYGTGRMKLSHSG-----I---GRGLNGEYAFVFNIALALDKNVQKPE-----KNQVGLFANSLRDQIVEKP  
Pseudomonas syringae (Gammaproteobacteria) gi|28871348|NP\_793967 140aa 2/2Hb1  
>Psesyr1  
AGCAQQPPRDDSLYQLGQ-----RAGIQRIVEGMLLNIAKDE-RIVEH---FKKV-----NIVRLRDLKVEQLCVAEGP-----CRYTGDSMAESHKQGN-----I---TPSDFNALVENLIAAMD TENVPVF-----VQNRILIARLAPMRGEVLGK  
Pseudomonas syringae gi|23471254|ZP\_00126585 142aa 2/2Hb1  
>Psesyr2  
CAQQQPPKDDSLYQLGQ-----RAGIQRIVEGMLINVARDO-RIVEH---FRKV-----DIVRLRDLKVEQLCVESGGP-----CRYTGDSMAEAHKQGN-----I---TPSDFNALVEDLIASMDTEKVPVF-----AQNRILIARLAPMRGEVIGK  
Rhodospirillum baltica gi|32475444|NP\_868438 127aa 2/2Hb1  
>Rhoab1  
MSQSESLDQLGG-----MDGVRVVDMEVMYRVLAD-PELTFH---FDGV-----PIEKLRMQTEFIASITSGD-----IQYTGADLTKVHAGRG-----I---TGVFHFKFCHGLTDALANNVSSH-----AIDQVGLKIAMSKDVTGSSNVDG  
Xanthomonas axonopodis (Gammaproteobacteria) gi|21243436|NP\_643018 131aa 2/2Hb1  
>Xanaxo  
TSACASTQSRQTLYDELGG-----QAGIEALVETMLSIADD-PRIVDK---FARV-----NIVMLNERLVQKFCHVADGP-----CPDTAKSMQQAHAHLA-----I---REGDFNALVEDLNWMDQRKIP-----RRTQNRLLARLAAMHGEIVNH  
Xanthomonas campestris (Gammaproteobacteria) gi|21231965|NP\_637882 142aa 2/2Hb1  
>Xancam

-----LSACATTQPRQTLVEELGG-----QPGIEALVEITMSRIADD-PRIVEH-----FARV-----NIVMLNERLVKQFCHVADGP-----CPDTAKSMAQAHQHMA-----I-----REDDFNALVEDLNWAMDQRNIP-----RRTQNRLLARLAAMHGEIVNH-----  
Methylococcus capsulatus (Gammaproteobacteria) 134aa 2/2Hb1  
>Metcap1  
-----KLADWNESHGSLVEKLG-----EAAVNAADVIFRYKVLAD-PRINRF-----FEGV-----DMEKQAAKQKAFITMAFGGP-----HNYTGMDMRGHAHL-----V-KQGLNDAHFDAVMEHLGATMKELN-----VPDELTQAQAAIAESTRNDVLGR-----  
Mycococcus xantus (Deltaproteobacteria) 116aa 2/2Hb1  
>Myxxan1  
-----SVYEQLG-----EPAMAAAVEVFYRKLADD-HISHF-----FEDV-----DMERQAAKQKAFITMVTGGP-----VHYSKGMFRAGHAPL-----V-KRGLNDSHFDAVGHKATLEEL-----GVAAPLVARVMITAESARADV-----  
Synecococcus sp.PCC7002 (Cyanobacteria) gi|18766961|AAL79195.1 124aa 2/2Hb1  
>Syncc  
-----MASLYEKLGG-----AAAVDLAVEKFKVLAD-RVNR-----FVNT-----DMAKQKQKQKDFMTYAFGGT-----DRFPGRSMRAHQDLVNA-G-I-----TDVHFDAIENLVLTQLQNV-----SQDLIDEVVTIVGVSQHRNDVLNR-----  
Synecocystis sp.PCC6803 (Cyanobacteria) gi|16330583|ref|NF\_441311 124aa 2/2Hb1  
>Synycs  
-----MSTLYEKLGG-----TTAVDLAVKFKYERVLQD-RIKHF-----FADV-----DMAKQRAHQKAFITYAFGGT-----DKYDGRYMRHAHELVENH-G-I-----NGEHFDAVAEDLLATLKEMGV-----PEDLIAEVAAVAGAPAKRVDLWQ-----  
Acidithiobacillus ferrooxidans (Gammaproteobacteria) TIGR\_243159|contig:10428:a 129aa 2/2Hb2  
>Acifer1  
-----MLEPESTPYVRLGG-----EAAVRNLVNFYDLMDS-ACWOTPLRDIHAK-----DLSESEKELFLFLSGWLGPP-----YVQFGRHPLRARHASP-----V-----DDQARDQWMACLMQAMHEV-----GIEPELYGHLQAGFQRTADFMNRN-----  
Agrobacterium tumefaciens (Alphaproteobacteria) gi|15889651|NF\_355332 2/2Hb2  
>Agrtum1  
-----SKEATMSSETVLYEAI GG-----DATVRALTRRFYELMDTL-PEAARCRA-IHPA-----DLSGSEAKFYDYLTGYLGGP-----PVYVEKHGHPMLRRRHVAP-----I-----GPAERDEWLLCFRRAMDETIE-----NAKLREI IWAPVERLAFHMNQAEADNF-----  
Azotobacter vinelandii (Gammaproteobacteria) gi|23105627|ZP\_00092083 2/2Hb2  
>Azovin  
-----MIVNLVTFYQLGG-----EGVRRLLCNAFYRMEGL-PEAEGIRR-M-----HGADTTAVREKLFYELSGWLGPP-----YLEKYGVSMGLHRPFA-----I-----GPKERDQWMLCLNKALDDIGAS-----ETAKGLIKAPHFADHVRNRETSD-----  
Bacillus anthracis (Firmicutes) gi|30261307|NP\_843684 2/2Hb2  
>Bacant  
-----MSKQMPFFFAI GG-----EQCIELVDTFYYSVSKH-PDLSPI-----FP-----DDLTTETARKQKQFLTYQLGGP-----YTEEHGHPMLRARHLFFP-----I-----TPKRAEAWLSCMEQAMDDTGVHG-----HIREFVFERLALTAQHMVNTFNETGE-----  
Bacillus cereus (Firmicutes) gi|30019349|NP\_830980 132aa 2/2Hb2  
>Baccer  
-----MSKQMPFFFAI GG-----EQCIALVDTFYYSVSKH-PDLSPI-----FP-----EDLTETARKQKQFLTYQLGGP-----YTEEHGHPMLRARHLFFP-----I-----TPKRAEAWLSCMEQAMDDTGVHG-----IREFVFERLALTAQHMVNTFNETGEV-----  
Bacillus halodurans (Firmicutes) gi|15615417|NP\_243720 2/2Hb2  
>Bachal  
-----MVELNRTVYERIGG-----DKTVSALVDAFYTVAGD-PILAPI-----FP-----NDLTETARKQKQFLTYQLGGP-----YTEEHGHPMLRARHLFFP-----I-----TPRRAKAWLTCMERAMDEINLSP-----EREEMARLMTAHHMVNQPEHR-----  
Bacillus licheniformis (Firmicutes) gi|52079659|YP\_078450 132aa 2/2Hb2  
>Baclic  
-----MGQSFNAPYEAIG-----EELLSQLVDTFYYSVSKH-PDLSPI-----FP-----DDLTTETARKQKQFLTYQLGGP-----PLYTEEHGHPMLRARHLFFP-----I-----TPERADAWLSCMEAMDHVGLKGE-----IREFLFERLALTARHMVNQPKMEDGSH-----  
Bacillus subtilis (Firmicutes) gi|16078221|NP\_389038 2/2Hb2  
>Bacsu2  
-----MGQSFNAPYEAIG-----EELLSQLVDTFYYSVSKH-PDLSPI-----FP-----SDLTETARKQKQFLTYQLGGP-----YTEEHGHPMLRARHLFFP-----I-----TNERADAWLSCMEAMDHVGLGE-----IREFLGRLELTARHMVNQTEADRS-----  
Bacillus thuringiensis (Firmicutes) gi|49477128|YP\_035435.1 132aa 2/2Hb2  
>Bachtu  
-----MSKQMPFFFAI GG-----EQCIALVDTFYYSVSKH-PDLSPI-----FP-----DDLTTETARKQKQFLTYQLGGP-----NLYTEEHGHPMLRARHLFFP-----I-----TPKRAEAWLSCMEQAMDDTGVHG-----IREFVFERLALTAQHMVNTFNETGEI-----  
Bdellovibrio bacteriovorus (Deltaproteobacteria) gi|39576266|NP\_969438 137aa 2/2Hb2  
>Bdebacl  
-----MSEKKPYELGG-----EVLRLQCKRFYEMDTI-PEAKGIRD-MH-----PGNLRGSEKFLMFLSGWLGPP-----GLFVEKYGHPLRMHRHFFK-----I-----GKSERDQWMMCMQVAFDELNIAEP-----LRSELHSLRLLDHMRNVEEPESSE-----  
Bordetella pertussis (Betaproteobacteria) gi|33593344|NP\_880988 2/2Hb2  
>Borper1  
-----QPISEPLDTSKTFVDMGG-----EPGVRELVDRFYDLMDS-SD-----FKALR-----DAHPSLEQARDKLFWFLCGYGGP-----H-YIERFGHPRLRARHLFFS-----I-----GEIERDQWVACGRAMDQQL-----PAALVDRLLQAFYGTADWMRNRAG-----  
Bradyrhizobium japonicum (Alphaproteobacteria) gi|27376186|NP\_767715 131aa 2/2Hb2  
>Braajpl  
-----MMDSDVAISMFERIGG-----SATDILLVDRFYRMDT-PEAKV-----TRAM-----HAADLGLRDLVKRYLTEWTGGP-----RLYSVEKHGHPRLRQHIGFA-----I-----GDAERDAWLTCMRGALETVAD-----AAARQDLKALSGLDWMRNR-----  
Burkholderia cepacia (Betaproteobacteria) gi|46323938|ZP\_00224300 142aa 2/2Hb2  
>Burcep1  
-----AHSLHAHAPSPFDRLGG-----AALARLVDAFYRQMDTR-PDAQRIRA-MHGA-----DLGPVKTLVTYLCEWLGPP-----RHYSARQGHPLRMHRHFA-----I-----GMAERDAWLCMRALDECGVEP-----ALRDELQALFKLADWLENTGR-----  
Burkholderia cepacia (Betaproteobacteria) gi|46311329|ZP\_00211937 136aa 2/2Hb2  
>Burcep2  
-----TDVNDAPSPPTAFELVGG-----EARVREMDRFDYDLMDS-PE-----FAQIR-----ALHPDSDLGSRDKFFWFLCGWLGPP-----DHYISRFGHPRLRARHLFFP-----I-----ASVERDQWLRCAWAMDDIGLPE-----FLRERLMSFYDTADWMRNRPG-----  
Burkholderia fungorum (Betaproteobacteria) gi|48786054|ZP\_00282263 139aa 2/2Hb2  
>Burfun1  
-----AIPSSQQLPRATHFDRLGG-----PAVIRLVDAFYRMDTR-PDAQRIRA-MHHP-----DLSSTKAVLVLYLCEWLGDD-----KYSAQRGHPLRMHRHFA-----I-----GLAERDAWLTCMRGALETVGDP-----ALRDELQALFKLADWLENTGR-----  
Burkholderia fungorum (Betaproteobacteria) gi|48784261|ZP\_00280627 137aa 2/2Hb2  
>Burfun2  
-----DLNDEVSAQPTAFELVGG-----ARVRELVDRFYDLMDS-AD-----FAGIR-----ALHPDSDLGSRDKFFWFLCGWLGPP-----HYISRFGHPRLRARHLFFP-----I-----ASSERDQWLRCAWAMDDIGLPE-----LRELLGSFFETADWMRNRNG-----  
Burkholderia mallei (Betaproteobacteria) gi|52428830|AAU49423 135aa 2/2Hb2  
>Burmal  
-----TDVNDAPSPPTAFELVGG-----ARVRELVDRFYDLMDS-PE-----FAGIR-----ALHPPTLEGSRDKLFWFLCGWLGPP-----HYIERFGHPRLRARHLFFP-----I-----ASSERDQWLRCAWAMDDIGLPE-----LRELLMSFHDADWMRNRPG-----  
Burkholderia pseudomallei (Betaproteobacteria) gi|13774099|gb|AAK38159 170aa (36-170) 2/2Hb2  
>Burpsel  
-----TDVNDAPSPPTAFELVGG-----ARVRELVDRFYDLMDS-PE-----FAGIR-----ALHPPTLEGSRDKLFWFLCGWLGPP-----HYIERFGHPRLRARHLFFP-----I-----ASSERDQWLRCAWAMDDIGLPE-----LRELLMSFHDADWMRNRPG-----  
Chloroflexus aurantiacus (Chloroflexi; Green non-sulfur bacteria) gi|22973316|ZP\_00020053 140aa 2/2Hb2  
>Chlaur  
-----HYGEVYIMSEPTIYIGG-----EATFRIRVIDFYARVAD-PRLRHL-----FP-----ADLEPGKEHQRLFLMQLYFGGP-----TYSERRGHPLRMHRHAFP-----I-----GPRERDAWLEHMLAALNEAGVPE-----PARSVMENYFRHAAQAMNRLGED-----  
Chromobacterium violaceum (Betaproteobacteria) gi|34499146|NP\_903361 129aa 2/2Hb2  
>Chrvioc  
-----MSEVQEMTPYQLGG-----EGVVRWLTDRFYDMDSE-PSVKPLRD-M-HP-----ADLAGSRQKLFMFLSGWLGPP-----LYMEAFGHPLRMHRMFA-----V-----DEDARDQWMCRRRAVSEL-----VVEDWLKDKLEAFENTADFMNRN-----  
Corynebacterium diphtheriae (Actinobacteria) gi|38234371|NP\_940138.1 2/2Hb2  
>Cordip  
-----MNTPASFYESVGG-----EETFLIIVHRFYERMRND-LIGPM-----YP-----DDWEGAEEDLRWFLAQYGGP-----TFSENHRGHPRLMRHAFP-----I-----GMNEAQRLWIDMSDITDISEATLPP-----AHRAMWDMHQVAMQLINQAP-----  
Corynebacterium efficiens (Actinobacteria) gi|25028901|NP\_738955 2/2Hb2  
>Coreff  
-----MTSTENFYDSVGG-----EETFLIIVHRFYEQVTRDD-ILGPM-----YP-----DDWEGAEARLWFLVQYGGP-----DYEQRGHPLRMHRHAFP-----I-----GVTAERWELMTRALDSLEECTL-----TDDQRAAIWDMHVRADMLINSNPPDHR-----  
Corynebacterium glutamicum (Actinobacteria) gi|19553644|NP\_601646 2/2Hb2  
>Corglu  
-----MTSTENFYDSVGG-----EETFLIIVHRFYEQVTRDD-ILGPM-----YP-----DDFEGAEQRLWFLSQQYGGP-----DYEQRGHPLRMHRHAFP-----I-----GVTAERWELMTRALDSLEECTL-----TDDQRAAIWDMHVRADMLINSNPPDHR-----  
Cytophaga hutchinsonii (Bacteroidetes/Chlorobi; green sulfur bacteria) gi|23136839|ZP\_00118553 2/2Hb2 2/2Hb2  
>Cythut  
-----MEKALYVRLGK-----ENLDDLVDYFDLVVND-QIAHL-----FKN-----DKKEIKGKQRLFLQPLGGP-----LYSEKFGHPQMRMRHHP-----I-----TETDAIWLHMSQAIGSLVSEA-----LKDELFAFPPTAMFVNKKEEQ-----  
Deinococcus radiodurans (Thermus/Deinococcus) gi|15806025|NP\_294726 2/2Hb2  
>Deirad  
-----MTPLDLARGSLYDRIG-----DTALLVHRFYARVARN-PDLAPI-----FPA-----DLSETARKQKQFLTYQLGGP-----LYHELYGHPLRARHLFFP-----I-----TPGRARAWLCMNAALRETPGLAEA-----DAHELYAALARAVHVMNTEAPDSD-----  
Exiguobacterium (Firmicutes) gi|45532753|ZP\_00183753 126aa 2/2Hb2  
>Exiguo  
-----MLYEDLGG-----KQAEQVLFYRERYVADH-LLRPL-----FP-----SDRRQVEQATRFILQTLGGP-----KQYESYDERMMLAMHRLPL-----I-----TEVHAIWIELMTMTIETISDSEA-----ATRLIERIRIGALVLRICDAHQRN-----  
Chloroflexus aurantiacus (Chloroflexi; Green non-sulfur bacteria) gi|53799877|ZP\_00359558 127aa 2/2Hb1

>Chlaur  
-----MSEPTIYEQIGG-----EATFRRIVDIFYARVEAD-FRLRHL--FP-----ADLEPGKEHQRLFLMQYFGGP-----RTYSERRGHPRLMRHAPFP-----I-----GPRERDAWLEHMLAALNEAGVPE-----PARSVMENYFRHAAQAMNRLGED-----  
Kineococcus radiotolerans (Actinobacteria) gi|46365419|ZP\_00227907.1 149aa 2/2Hb2  
>Klnrad  
-----RKPAGPDGGRSFFDEVGG-----HEFTVRLVDVDFYEGVADE-VLRHM--YP-----EADLGPARGMLMFLEQYWGVP-----ATYSEQRGHPRLMRHASFK-----V-----NPDARDRWLTHMRAAVVSLGLAP-----AQEGVLDVYDRAAHSMLNTFED-----  
Leifsonia xylaii (Actinobacteria) gi|50954582|YP\_061870 135aa 2/2Hb  
>Leixyl  
-----TGIPVGPAGPTFFFEQAGG-----HDTFRRLVDVDFYEGVAAD-VLRLRM--YP-----EEDLEPAERLTLFLFEQYWGVP-----AAAYSEQRGHPRLMRHLPFR-----V-----NPDARDRWLNMRAAVLELALP-----PLQEETLSYLERAAFAMVNTFEE-----  
Leptospira interrogans (Spirochaetes) gi|24216675|NP\_714156 145aa 2/2Hb2  
>Lepint  
-----GGFPQIPGLQLVFGVSGE-----NSLRKLVSDFYDQIPSS-SIS-FM--FP-----ENLEDSKIKSADFLIQVTGGP-----LYSQNYGPFKMRARHLFPF-----I-----DEKARRVWLSYCRVRLDDWADEV-----SAKEVLWIFFKDFSTWVMNLESKTEE-----  
Mesorhizobium loti (Alphaproteobacteria) gi|13470534|NP\_102102 160aa 2/2Hb2  
>Meslot  
-----MSRDVPTLYEWAGG-----SDALNRLTQTFYDKVAKD-PVVGVP--FKAM-----SPDHPSHVAAFIGEVEFGP-----YSEKFGHREMVMHHLGKH-----L-----TEEQRRRWLNLLADADEVGLPDD-----PEFRSAFMGYVEWGSRLAKMNSNLGET-----  
Methylobacillus flagellatus (Betaproteobacteria) gi|46120937|ZP\_00201861 137aa 2/2Hb2  
>Metfla  
-----DKIGEPGSKATFELLGG-----AEQVRAIVERFYDMDTD-PRAAGIRA-MHAP-----DLTSAREKLFMFLTGWGTGGP-----QLYMERYGHPRLMRHMSFF-----I-----DDSDARQWVMYCMVKAMHDTGVDE-----AIIEKMGAALYGVADFMNRREG-----  
Methylococcus capsulatus (Gammaproteobacteria) 131aa 2/2Hb2  
>Metcap2  
-----MQEPTVQTPYQRLGG-----EAVLHELVERFYGMDEL-PEAAP IRA-MHA-----DDLSGAKSLKFKFLSGWLGGP-----LFVQEGHFLRARHFFFS-----I-----GVPERDQWLLCMRKALDDIPLDGPF-----EALYEALARTAHMINRED-----  
Microbulfiber degradans (Gammaproteobacteria) gi|48862691|ZP\_00316586 137aa 2/2Hb2  
>Micdeg2  
-----MNEYGYGQGDASYKAAAGE-----IGETRLVDVDFYHFMDTL-PEAAKILRS-MHAQ-----SLAESRKRLAYFLSGWLGGP-----RLYAQHGFSINIPGAHRH-----L-----AATPEDADANWLMCAKAVDLQPYEP-----SFKQYLLQLRVPADRIVEAGRKPL-----  
Mycobacterium avium (Actinobacteria) gi|41408389|NP\_961225 (HbO) 129aa 2/2Hb2  
>Mycavi2  
-----SFYDAVGG-----AETQAVISRFYAQVPEDE-ILREL--YPL-----DDLEGAERLRMFLEQYWGVP-----TYSDRRHGHPRLMRHVPFR-----I-----TPLARDAWLRCMHTAVASIDSKTLD-----DEHRELLDYLEMAAHSLVNSP-----  
Mycobacterium bovis (Actinobacteria) gi|31793651|NP\_856144 128aa (HbO) 2/2Hb2  
>Mycbov2  
-----MPKSFYDAVGG-----AKTFDAIVSRFYAQAQVADE-VLRRV--YPE-----DDLGAEEERLRMFLEQYWGVP-----TYSEQRGHPRLMRHAPFR-----I-----SLIERDAWLRMHTAVASIDSSETLD-----DEHRELLDYLEMAAHSLVNSP-----  
Mycobacterium leprae (Actinobacteria) gi|15827640|NP\_301903 128aa 2/2Hb2  
>Myclep2  
-----MQQSFYDAIGG-----AETFKAVISRFYAQVPEDE-ILREL--YPA-----DDLGAEEERLRMFLEQYWGVP-----TYSSQRGHPRLMRHAPFR-----I-----TAIERDAWLRMHTAVASIDSHTL-----DNEHRELLDYLEMAAHSLVNSAS-----  
Mycobacterium smegmatis (Actinobacteria) 136aa (HbO) 2/2Hb2  
>Mycsme2  
-----MGDVTVQVRSFYDEVGG-----HDTTHAIVSRFYQLVREDE-ILHPL--YPE-----DDFEGAEERLRMFLEQYWGVP-----TYSQQRGHPRLMRHAPFR-----I-----GFLERDAWLRMHTAVASIDSQTLDDA-----HRRALLDYLMADSMVNSAF-----  
Mycobacterium tuberculosis (Actinobacteria) gi|15609607|NP\_216986 HbO 128aa 2/2Hb2  
>Myc tub2  
-----MPKSFYDAVGG-----AKTFDAIVSRFYAQAQVADE-VLRRV--YPE-----DDLGAEEERLRMFLEQYWGVP-----RTYSEQRGHPRLMRHAPFR-----I-----SLIERDAWLRMHTAVASIDSSETLDDE-----HRELLDYLEMAAHSLVNSP-----  
Nocardia farcinica (Actinobacteria) gi|54014789|BAD56159 134aa  
>Nocfar  
-----MSSQGTATSFYEAAGG-----AETFRRLVAAFYREVADE-ILRPL--YPE-----DDLGAEEERLRMFLEQYWGVP-----RTYSERGHPRLMRHMFPK-----V-----GFLERDAWLRMHTAVASIEVEPLDDE-----HRKALLDYLEMAAHSLVNSPI-----  
Novosphingobium aromaticivorans (Alphaproteobacteria) gi|48850360|ZP\_00304602 131aa 2/2Hb2  
>Novarol  
-----MATEAPALSPYDRIGG-----REVLRITDRFYDMDTD-PA--YAE LR-----AMHAPDLSPMREALAGFLSGCGGP-----RGWFEANPKCKMCKMHPFP-----I-----TRQTATQWADCMRAIADAAPEDTE-----VADAMAQVLQMAKGMARD-----  
Novosphingobium aromaticivorans (Alphaproteobacteria) gi|48847810|ZP\_00320259 133aa 2/2Hb2  
>Novaro2  
-----MTVPGTPYEAFGG-----EAAIRALCGRFYSYLMDEL-PGAACRA-VHPP-----SLERAERLFEYLTGWLGGP-----PLYTDKYGHPRLMRHFIAF-----I-----GREEVEGWLLCFRQAWSETIPASPL-----ADAIMEKVEGLAHWMKNDPIAGS-----  
Oceanobacillus ihyensii (Firmicutes) gi|23098673|NP\_692139 128aa 2/2Hb2  
>Oceihe2  
-----MEQMEHRTIYEAIIGG-----YRTMNIIVHAFYTRVEVH-PDLKPI--F-----PDDLTEITIRQMMFLTQFFGGP-----LYEEERGHPLRRRHLFPF-----I-----TPTRDAWLTMAAAEEAEIKEP-----YRTAMERLTLTANHMNTPE-----  
Parachlamydia sp. UWE25 (Chlamydiae) gi|46446613|YP\_007978.1 146aa 2/2Hb2  
>Parach  
-----SGFPQITPDSRIYLSMG-----EDNIYKMLDFYLELEKS-SIRHL--FP-----ADMKAASKSAAFFVFCGGP-----PLYQQQFSPMRQRHLFPA-----I-----DEEARQVWLHSFKHILQGAQKYC-----FMEYMGSFYRFLDQFSTWMTNQSE-----  
Photobacterium profundum (Gammaproteobacteria) gi|46913965|CAG20747 160aa  
>Phopro  
-----QKTPYVGMGDTALLAAGG-----EEGVKLVDAFYDYMOTL-PEAEVVR-AHMKP-----DLTDSREKLTFTLGTWGGP-----SRYAEKYSGMNIPGAHRHLS-----I-----GIAEKEAWLQCMQKALDDQGYDD-----VFKRYVMVQLSFFAEMCRNRS-----  
Polaromonas sp. JS666 (Betaproteobacteria) gi|54032073|ZP\_00364205 146aa 2/2Hb2  
>Polaro  
-----ENPFGNPFPTFFANIGG-----EERVKALVERFYDLMLE-PG--YALR-----AAHGSLTDNARQRLFWFLCGWLGGP-----QHYTERFGHPRLMRHMPQQTGG-GAI--GSIGILLERDQWLACMQAMRETGVDD-----ALRTRLNASFQQTADWMNRNGE-----  
Ralstonia eutropha (Betaproteobacteria) gi|46132529|ZP\_00202928 139aa 2/2Hb2  
>Raleut  
-----PESTQAGTEVTAFDLVGG-----EARVRELVDRFYDLMLE-PE--FAGLR-----ALHPASLDGSRDKLFWFLCGWLGGP-----NHFIERFGHPRLRARHMPFE-----I-----GISERDQWNRCMALAMQDVGLSED-----LQMRMQAFQQTADWMNRNVAR-----  
Ralstonia metallidurans (Betaproteobacteria) gi|22977370|ZP\_00023178 2/2Hb2  
>Ralmet  
-----SNQPEEQREITAYELIGG-----EARVRELVDRFYDLMLE-TE--FAGLR-----ALHPSPLESGRDKLFWFLCGWLGGP-----NYFIERFGHPRLRARHLFPE-----I-----GTSERDQWNRCMALAMQDVGLSED-----LQMRMQALFQQTADWMNRNVR-----  
Ralstonia solanacearum (Betaproteobacteria) gi|17546809|NP\_520211 2/2Hb2  
>Ralsol  
-----MTDAASGQETLAFDLGG-----EARVRELVDRFYDLMLE-PA--FA--R-----ALHPSSLDGSRDKLFWF--HYI-----ERFHPRLRARHLFPE-----I-----GTRERDQWNRCMALAMQDLGIDDA-----LQMRMQAFQQTADWMNRNVR-----  
Rubrivivax gelatinosus (Betaproteobacteria) gi|47573541|ZP\_00243579 136aa 2/2Hb2  
>Rubgel  
-----TPPESTAPATFYEYVGG-----EHAVRALVDRFYDLMLE-PG--FHDLR-----RLHPSLTDGSRDKLFWFLCGWLGGP-----DLYVERFGHPRLRARHLFYS-----I-----GVRERDQWMCMEQAMHECEDP-----LLVSRKASFANTADWMNRNRT-----  
Shewanella oneidensis (Gammaproteobacteria) gi|24371639|NP\_715681 145aa 2/2Hb2  
>Sheone  
-----KVQDRDPNQSNAYDLIGG-----DKVIRAIANSFYQKASSE-ETRAL--FA-----IHRAPAESEQKLYEFLTWLGGP-----QKYGHPALRARHMFPA-----V-----DEAMRDQWLFCKMFAIEKHKKP-----EHRAAIYEAISTLADHMRNQ-----  
Sinorhizobium meliloti (Alphaproteobacteria) gi|15966172|NP\_386525 130aa 2/2Hb2  
>Sime11  
-----MTEPQTTLIYEALIGG-----DATVRLTQRFYELMDSL-PEAACRA-VHPP-----DLTGSSEKFYEYLTGWLGGP-----YVQKRGHPLMRHRRHFIAG-----I-----GPAERDEWLCFTRALEETVSHPK-----LREIILEPTLRAHMQNKE-----  
Staphylococcus aureus (Firmicutes) gi|15923993|NP\_371527 121aa 2/2Hb2  
>Staur  
-----MITTFYDIIG-----KEALYDMIDFYTLVEKDE-RLNHL--FP-----GDFAEISRKQKQFLTQFLGGP-----YTEEHGHPLMRHMDFT-----I-----TEFERDAWLNMQTAINRAAFPQG-----VGDYLFERLRLTANHMVNS-----  
Staphylococcus epidermidis (Firmicutes) gi|27467610|NP\_764247 121aa 2/2Hb2  
>Stae1  
-----MSKTPYELIG-----QKALYQMDHFYQLVEKDS-RINHL--FP-----GDFKTSRQKQKFLTQFLGGP-----DLYTQEHGHPLMRHMEFT-----I-----SEYERDAWLNMQTAINRAAFPQG-----VGDYLFERLRLTANHMVNS-----  
Streptomyces avermitilis (Actinobacteria) gi|29831913|NP\_826547 134aa 2/2Hb2  
>Strave  
-----NEIRRGTLQEQTFYEQVGG-----EETFRRLVHRFYEGVAGD-PLLKPM--YP-----EEDLGAERFRLFLLQYWGVP-----YSEQRGHPRLMRHAPFA-----V-----DRAAHDWLRKHMRAVAVDELGLS-----EEHEHTLWNYLYTAAASMVNTES-----  
Streptomyces coelicolor (Actinobacteria) gi|21221127|NP\_626906 137aa 2/2Hb2  
>Strcoe  
-----NEIRRGTLQEQTFYEQVGG-----EETFRRLVHRFYEGVAGD-PILRPM--YP-----EEDLGAERFRLFLLQYWGVP-----YSDNRGHPRLMRHPFA-----V-----DRAAHDWLRKHMRAVAVDELGL-----SEEHEQTLWKYLYTAAASMVNTFG-----  
Thermobifida fusca (Actinobacteria) gi|48835434|ZP\_00292434 163aa 2/2Hb2  
>Thefusc  
-----MTSQDDQMTFYEAVGG-----EETFRRLARFYEGVAAD-PVLRPM--YP-----EEDLGAERLRLFLLQYWGVP-----YSERRGHPRLMRHFPYR-----I-----GAEERDRWLTHMRAAVDDLALPA-----HLEQQWLEYLYTAAASMVNPEDAQFP-----

Thiobacillus denitrificans (Betaproteobacteria) gi|52006448|ZP\_00333828 126aa 2/2Hb  
>Thiden  
-----MQTHYDLGG-----ADTIRRLVDRFYDLMDED-PDY-----YG-IR-----KLPHTDLTESRNKLAFLSGWTGGP-----PEYTDRFGHPFLRRRHLPFV-----I-----GESERDQWGMCMIRAMQDVLDA-----ALQQELTAALFQTADFMRNQ  
Verruimicrobium spinosum (Chlamydiae/Verruimicrobia) gml|TIGR\_240016|contig:335 121aa 2/2Hb2  
>Verspi  
-----MVDFFYRLGE-----EALTRVLAFAFYRKKADD-LLGFM-----YFP-----EDWEGAERRLRDFLIFRFGGP-----DQYIQERGHPRMLRHAPFK-----I-----GVAERDRWLDLGMGAAMKEVGIPE-----DLAPTLOGGFAQVADFMRN  
Acidithiobacillus ferrooxidans (Gammaproteobacteria) TIGR\_243159|contig:10428:a 132aa 2/2Hb3  
>Acifer3  
-----MEQVSPKRRLEFLCEK-----ITPLVIRAVDDFYNRIQHH-PTLAEP-----FSIV-----QDWELHKLRVHYWVTVSGGL-----PYKDYRYALGDKHAPLG-----I-----THSLVDDWLALFHETMLDHDMDAD-----MARRWHGMAAGISESLRMFAPR  
Agrobacterium tumefaciens (Alphaproteobacteria) gi|15887600|NP\_353281 2/2Hb3  
>Agrtum2  
-----VHNAEQDRAEKAMAEIGV-----DAAFIDLLVETFYGRVLEHQTLGPV-----FD-----AGRWPEHMRMARMQFWTAIAFKN-----GSYGGKPVQAHLG-----V-----QGMSAELFPQWLALFSVTLDDIAPSRKAHD-----WFMETAERIAARSLTSLFLYFNPAMDDP  
Agrobacterium tumefaciens (Alphaproteobacteria) gi|17934166|NP\_530956 2/2Hb3  
>Agrtum3  
-----MARIGV-----DAAFIDLLVETFYGRVLEHQTLGPV-----FDARL-----AGRWPEHMRMARMQFWTAIAFKN-----GSYGGKPVQAHLG-----V-----QGMSAELFPQWLALFSVTLDDIAPSRKAHD-----WFMETAERIAARSLTSLFLYFNPAMDDP  
Bdellovibrio bacteriovorus (Deltaproteobacteria) gi|42523942|NP\_969322 128aa 2/2Hb3  
>Bdebac2  
-----MTPTSRKPLES-----REDVMVLVDSFYAKVRAD-GYIGPI-----FTDV-----AKVDWEHLPKLYNFWSDLLLGE-----DSYRGRFPFPHTKLN-----L-----ERGHFEQWLRLEFVETVDEHFVGLKANE-----AKERAYRIARNFMINLQLLSLE  
Bordetella pertussis (Betaproteobacteria) gi|33593122|ref|NP\_880766 2/2Hb3  
>Borper2  
-----NGAPDLCTE-----EDITQLVHQFYAEVRDD-AELGPI-----FN-----THVDDVHVLAKLVDFWSSILRGT-----RGTPMPRHVALPGLHAG-----L-----FERWLRFRATAAAQPNQAMAEQ-----ACLMAGRIAQSLWYGYQLHRSPDQA  
Bradyrhizobium japonicum (Alphaproteobacteria) gi|27381333|NP\_772862 154aa 2/2Hb3  
>Braajap2  
-----AAAARRNLLTQDAERTGI-----TEEMIAELVTRFYGRVRDD-ALLGPV-----FAV-----VQNWDEHLAKLGFDFWSSVVLMS-----S-----PMRAHPLGLVLQDGHDFRW-----L-----DLFEQTARDVCCPAAAAALFDKA-----RRIADSFEMASATVAGRIASPRHVLRS  
Brucella melitensis (Alphaproteobacteria) gi|17988743|NP\_541376 141aa 2/2Hb3  
>Brumel3  
-----MTILINQPH-----SIDRDSIDRLVEIFYGRAREDE-IIGPI-----FNRT-----VKDWDHHLARISEFWSVILKT-----R-----PMPPHLALNLENEHDFRW-----L-----ELFEQTAREIFPPEAAIIFVDRA-----RRIADSFEMAIATHSGRIAPRHSRRP  
Burkholderia cepacia (Betaproteobacteria) gi|46315472|ZP\_00216054 186aa (1-155) 2/2Hb3  
>Burcep3  
-----MTALPASPDAPARPD-----TEPTEENIRDLVYAFYDRVRAD-PLLGPV-----FDAK-----LEGRWDDHLPKMTVFWSSVLGT-----K-----GYRGNVQAAHQPLDG-----I-----EPAHFSRWLWLFKLVETRYAPPAA-----IRFMFEPALRIAQSLQSRFGWDYQIPP  
Burkholderia cepacia (Betaproteobacteria) gi|46323547|ZP\_00223911 190aa (1-155) 2/2Hb3  
>Burcep4  
-----MTSLPASDAPARPD-----AEPTEANIRDLVYAFYDRVRAD-PLLGPV-----FD-----AKLDGRWDHLPKMTVFWSSVLGT-----R-----GYRGNVQAAHQPLDG-----I-----EPAHFSRWLWLFKLVETRYAPPAA-----AVRFMEPALRIAQSLQSRFGWDYRIPA  
Burkholderia fungorum (Betaproteobacteria) gi|48783812|ZP\_00280193 181aa (1-154) 2/2Hb3  
>Burfun3  
-----MNPSPAAPAVERAAHP-----TEANIRDLVYAFYERVRAD-ALLGPV-----FDAT-----LADRDWDDHLPKMTVFWSSVLGA-----VQAAHQPLEGIEPQHSRW-----L-----YLFLDTVQSRYPAAAVR-----FMFEPALRIAQSLQSRFGWDYKIFE  
Burkholderia mallei (Betaproteobacteria) 144aa 2/2Hb3  
>Burmal4  
-----TQAFSASSAAKPARDAEP-----TPENIRALVDAFYDRVRDD-ALLGPV-----FE-----SKLAGRWQDHLPKMGFEWSSVLGT-----KSYRGNVQAAHQPLDG-----L-----EPVHFSRWLWLFKLVETRYAPPAA-----AVRFMEPALRIAQSLQSRF  
Burkholderia pseudomallei (Betaproteobacteria) gi|53719116|YP\_108102 180aa (36-170) 2/2Hb  
>Burpse2  
-----TQAFSASSAAKPARDAEPT-----PENTRALVDAFYDRVRDD-ALLGPV-----FE-----SKLAGRWQDHLPKMGFEWSSVLGT-----KSYRGNVQAAHQPLDG-----L-----EPVHFSRWLWLFKLVETRYAPPAA-----AVRFMEPALRIAQSLQSRFGWDYR  
Campylobacter jejuni (Epsilonproteobacteria) gi|15791829|NP\_281652 2/2Hb3  
>Camjej  
-----MKFETINQ-----ESIAKIMEIFYEKVRKDK-DLGPV-----FNNAI-----GTSDEWEKHAKKIGNFWAGMLLGE-----GDYNGQPLKXHL-----L-----PPFPQEFFEIKLFEESINIVYNEE-----MKNVILQRAQMIASHQNMILYKYGGH  
Caulobacter crescentus (Alphaproteobacteria) gi|16127286|NP\_421850 2/2Hb3  
>Cauce  
-----MSLSPRSQARADA-----APFDEEIDRLVETFYARIRQHH-RLGPI-----FEAA-----IGPDGWEHLAKLDFWSSVLNLS-----GRYKQGVAAHQGVGEG-----V-----TEGLFTPWGLFHMTCALFDAP-----RAAIIQKAEARIAATKLGFRHPGAVA  
Desulfitobacterium hafniense (Firmicutes) gi|23119438|ZP\_00102524 2/2Hb3  
>Deshaf  
-----MFKRGMRSDD-----LDEAALALVRRFYAAVREDD-RLGPV-----FA-----AAIDWDWAHERLLIDFTSMLGS-----GRYRGNPAQMLHRHAGR-----I-----QPELFAHWLWLRRCSEHTLPPAAQ-----AAVQAARAGIAEHLQRLLAQA  
Helicobacter hepaticus (Epsilonproteobacteria) gi|32261711|gb|AAP76761 2/2Hb3  
>Helhep  
-----MTFKEINVDISIR-----KLMDFYAKVRADKSLGDI-----FNTKI-----GTSDEVNKHAKIANFQGMMLNS-----GDYNGQPLKAHL-----L-----PPFPRELFVWNLNLFEEISLAVYAKEE-----HISLILQRAQMIARFQYIIESGLHH  
Mesorhizobium sp. BNC1 (Alphaaproteobacteria) gi|45680999|ZP\_00192444 154aa 2/2Hb3  
>Mesorhi  
-----MSKQSAGRTTIIVDGVFLPE--ILDERMIHDVHGFYBEIRNDD-LLGPI-----FNQA-----INSEAWPHHLAKMCDFWSATLLRRT-----KRYEGRPLPPHLA-----I-----PGLGEVHFRWMLFRATVDRLCPADVA-----VLFMDRALRIASFRLAVAFSRGDDTL  
Methylococcus capsulatus (Gammaproteobacteria) gi|53804116|YP\_114018 140aa 2/2Hb3  
>Metcap3  
-----MATHCTSSMSTHLP-----EQIAEMVRRFYRQVLADD-RLRPI-----FD-----AAITDWDTHRRVQDFWSSRTLLD-----DRYRGHYPVHAQPL-----L-----QPEHFDIWELEFRKAAREVLPADSAA-----RAIARAEMHMAESFKAGMFSFRVYEGP  
Mycobacterium avium (Actinobacteria) 148aa 2/2Hb3  
>Mycavi3  
-----MPDLRD-----RADVEALLRRFYGRALDDE-VLAEP-----FARL-----RATGLDDHVP TCMDFVETVLFRA-----GRYRGSALQAHDRHRA-P-L-----SDRHFRRWLTWHITVDEMYRGAAD-----RAKIQAAIRIAWAMHRLTGADSPPELL  
Nitrosomonas europaea (Betaproteobacteria) gi|30249138|NP\_841208 141aa 2/2Hb3  
>Niteur3  
-----MIPRP IPEFSPDLYTE-----EEVSKLVHEFYAKARD-AALGPI-----FEEH-----VIDWDAHFVQMTNFWSAQLRGT-----SRFGAFMPKHIALPE-----L-----NETLFRKWLQFRQTTLELGNPLL-----KQHADTVAEFIAGRLWMGYQMSHFFHRE  
Novosphingobium aromaticivorans (Alphaproteobacteria) gi|48849793|ZP\_00303907 127aa 2/2Hb3  
>Novaro  
-----MNDLSITE-----GDIDRLVPEFYARVKDE-VLGPV-----FNQA-----IEDWPHDLERLKFVSSIMLTS-----GRYKQGLIAHVKEAH-----M-----TPENFARWLEWRQTTGDIIGPD-----KAELFRQKAARIESLTMGVQFYRERQRA  
Rhodospseudomonas palustris (Alphaproteobacteria) gi|39935786|NP\_948062 139aa 2/2Hb3  
>Rhopal  
-----MAYIVAMSLAHS-----ILNDDQIAQLVVRTFYGRAREDE-VIGPI-----FASA-----VHDWDHIIAQITDFWSSMLKT-----PMRPHMLNLNLAPEHDFRW-----L-----KLFEATATELFTPEVAT-----EFIIRARRIADSFEMGIATTQGVAT  
Silicobacter pomeroyi (Alphaproteobacteria) 2/2Hb3  
>Silpom3  
-----IFPAQIDH-----VVRVFYARIRTH-ABELGPV-----FAAH-----VRDWAHEARIAAFWRNALIKE-----MRVHVSVPDIRPDHFP-----L-----WLALFHEVLTLQELAAETAA-----RWGALADRIGHGLKMGIL  
Silicibacter sp. TM1040 (Alphaproteobacteria) gi|52009563|ZP\_00336926 137aa 2/2Hb3  
>Sillici  
-----MQDQVQIARFQISA-----DTRRNVVSVFYGEVRRH-PVLAAPV-----FNA-----HVEDWPQHEEKIANFWRNALIRE-----R-----VYDGFPMREHLRSPD-----V-----RAEHFPVWGLFHAVLEREVTAEE-----QALQWGHADRIAGEFRTGIESIRQ  
Sinorhizobium meliloti (Alphaproteobacteria) gi|15966331|NP\_386684 155aa 2/2Hb3  
>Simme12  
-----VQSAAMREAEEMKALGI-----DEAFIGKLVDFYARVLAH-PELGPV-----FDA-----RLSGRWPEHMERKMSFWSAVAFRS-----GAYGGKPVQAHLG-----V-----ANMSPPELFPKWGLFAATLDDIAPNEE-----AKANFMATAERIAARSLTSLFLYFNP  
Chlamydomonas reinhardtii 2/2Hbs  
Chlamydomonas reinhardtii 160981  
>Chlrei1  
-----MAADTAPADSLSYRMGG-----EAAVEKAVDFYERIVAD-PQLAPF-----FANV-----DMKKQRKQVAFMITYVFGS-----GAYGRDLGASHRRL-----IREQGMNHFFDLVAHLDSTLQELGVAQ-----ELKAEAMAVASARPLIFGTGEAGAA  
Chlamydomonas reinhardtii 160982  
>Chlrei2  
-----AAGVDAAPPSIFDRLGG-----EAAVEKAVDFYERIVAD-PQLAPF-----FEGV-----DMRTQRKQVAFMITYVFGA-----TGYTRDLAAHRRLL-----IRDKGLKEEHFDMVAGHLAGTLQLLIGGA-----DLVDEVIALVATKPIFIVER  
Chlamydomonas reinhardtii 157690  
>Chlrei3

-----GQSKSAATTRSTLHAKLGG-----AAVAATVDVYFKKLMND-PDLEFF-FRGMV-----DMVTLIAKQNRFLAYAFGAT-----THYHGKDIVMGAHL-----IINRGLNLTHFDKVGAGHFDVSLKEMGVGQ-----ELIDEAAGVLIGVRFLDFPERYKGVKD-----

Ciliate 2/2Hbs

Paramecium caudatum gi|121272|P15160 117aa  
>Parcau -----SLFEQLGG-----QAAVQAVTAQFYANIQADATVATF-----FN-----GIDMPNQTKNTKTAFLCAALGGP-----NAWTGRNLKEVHANMG-----V-SNAQFTTVIGHLRSALTSAGVAAALV-----EQTVVAEETVRGDOVTV-----  
Paramecium jenningsi gi|2147462|S60030 117aa  
>Parjen -----MTLFEQLGG-----EAAVAVTTFQFYANIQADATVANF-----FN-----GINMDQTKNTKTAFLCAALGGP-----KAWGGRNLKEVHANMG-----V-TNAQFTTVIGHLRSALTSAGVAAALV-----EQTVVAEETVRGDOVTV-----  
Paramecium multimicronucleatum gi|2147463|S60031 118aa  
>Parmul -----MTLFEQLGG-----EAAVAVTTFQFYANIQADATVANF-----FN-----GINMPQTQTKTAFLCAALGGP-----NAWAGRNLKEVHANMG-----V-TNAQFTTVIGHLRSALTSAGVAAALV-----EQTVVAEETVRGDOVTV-----  
Paramecium triaurelia gi|7428636|S60032 117aa  
>Partri -----MTLFEQLGG-----EAAVAVTTFQFYANIQADATVANF-----FN-----GINMDQTKNTKTAFLCAALGGP-----KAWGGRNLKEVHANMG-----V-TNAQFTTVIGHLRSALTSAGVAAALV-----EQTVVAEETVRGDOVTV-----  
Tetrahymena pyriformis gi|121274|P17724 121aa  
>Tetpyr -----MNRKQPIYKELGG-----ENAMKAAVFLFYKVLADE-RVKHF-----FK-----NTMDHQTKQQTDFLTMLLGGP-----NHYKGNMTEAHKGMN-----L-QNLHFDIAIENLAATLKELGVT-----DAVINEAAKVIETHTRKDMLGK-----  
Tetrahymena thermophila gi|417052|Q03459 121aa  
>Tetthe -----MRKQPTVFEKGG-----QAAMHAAVFLFYKVLADD-RVKHY-----FK-----NTNMEHQAKQEDFLTMLLGGP-----NHYKGNMAEAHKGMN-----L-QNSHFDIAIENLAATLKELGVS-----DQIIEAAKVIETHTRKDCCLGK-----

Plant 2/2Hbs

Arabidopsis thaliana GLE3 gi|18418064|NP\_567901.1 175aa  
>Arabid -----DQAEAFIDESNLFDKGL-----QTFINLSTNFYTRYVDEE-EWFQSI-FS-----NSNKEDAIQNQYEFFVQRMGGP-----FLYSQRKGFALIGRHRFPF-----V-----THQAAERWLHMQNALDSDVD-----QDSKIKMKFFRHTAFFLVAGNELKNQ-----  
Datisca glomerata 2/2Hb gi|31559437|CAD33536.1 169aa  
>Datisc -----KQEDAFADINLNFQKLG-----QTFVNLSTNFYTRYVDEE-EWFRSI-FA-----SKKEDAIQNQYEFFVQRMGGP-----FLYSRRKGFALIGRHRFPF-----V-----THQAAERWLHMLALDSTPD-----IDVDSKVMINFRHTAFFLVAGDELKNQ-----  
Glycine max 2/2Hb gi|44888958|AAS48191.1 (172aa,15-156)  
>Glycin -----SIADAFADIANLNFHKLGL-----QTLVNLSTNFYTRYVDEE-QEWFRI-FA-----NSDKQNAIQNIEFLVQRMGGP-----TLYSQRKGFALIGRHRFPF-----L-----THEAANRWLHMQALDSTSA-----IDDDSKIKLINFRTAYFLVAGVEHKDQ-----  
Hordeum vulgare 2/2Hb gi|14165165|AAK55410.1 171aa  
>Hordeu -----AAADAFADIVNVFEALGG-----TPQPFVLDSTNFYTRYVEDE-EWFRFI-FS-----GSKKEDAIQNQYEFFVQRMGGP-----PLFSQRKGFALIGRHRFPF-----V-----THRAAERWLHMQALETTS-----INPDKTKMNFRTAYFLVAGNEMTRQ-----  
Oryza sativa 2/2Hb gi|50725383|BAD32857.1 (172aa,15-158)  
>Oryza -----AAGDAFADIDGQVFEALGG-----TPQPFVLDSTNFYTRYVEDE-EWFRQI-FA-----GSKKEDAIQNQYEFFVQRMGGP-----QLFSQRKGFALIGRHRFPF-----V-----THQAAERWLHMQALETTS-----IDAATKTKMNFRTAYFLVAGNEMTRQ-----  
Triticum aestivum 2/2Hb gi|27085257|AAN85433.1 171aa  
>Tritic -----AAADAFADIVNVFEALGG-----TPQPFVLDSTNFYTRYVEDE-EWFRFI-FS-----GSKKEDAIQNQYEFFVQRMGGP-----PLFSQRKGFALIGRHRFPF-----V-----THQAAERWLHMQALETTS-----INPDKTKMNFRTAYFLVAGNEMTRQ-----  
Zea mays 2/2Hb gi|27085257|AAN85433.1 171aa  
>Zeamay -----AAADAFADIVNVFEALGG-----TPQPFVLDSTNFYTRYVEDE-EWFRFI-FG-----GSKKEDAIQNQYEFFVQRMGGP-----PLFSQRKGFALIGRHRFPF-----V-----THRAAERWLHMQALETTS-----IDVDSKTKMNFRTAYFLVAGNEMTRQ-----

Thalassiosira pseudonana scaffold\_18:64010:64489 160aa  
>Thapse2 -----QSLIATTSITPILLERIGG-----SSGFIPLSTLFLYRNFVNDKAMPW-----FLGI-----PATSTKDEAIDNQFRFLVQTFGGG-----ELYRQKKGKYLTRVGRHANYQ-----I-----QIAAAERWVHMEGAIDEHEALVDDE-----ARECKLYFRYTFYIVVASEFMRDDQ-----

GCSs

Bacillus subtilis Firmicutes gi:37927254|NP388919 433aa (40)  
>BacsubGCS -----VRLGDALYVLEQLQPLIQE-----NIVNIVDAFYKNDLSE-SLMDI-----INDHSS-----VDRLKQTLKRHIQEMFAGVID-----DEFIEKRNRIASIHRLIGL-----L-----PKWYMGAFQELLSMIDIYEAS-----ITNQELKKAIKATTKIINLEQQVLVE-----  
Acidithiobacillus ferrooxidans Gammaproteobacteria TIGR243159|contig:10428 880aa (13)  
>AciferGCS -----LGLQSDSFGVIDRYDALDK-----EASALAHAFYDYLISH-PATAAV-----FRDPSSA-----RLDALIQKQTEHAKGLVSRLD-----RPRESMRKIGALHHHLGIGPSW-I-----AGAYILYWRHWQKILQVDVVA-----DRGEEAAAVERDLRDLALFRLVGDLMVQLEGY-----  
Agrobacterium tumefaciens Alphaproteobacteria gi|15888368|NP\_354049 499aa (18)  
>AgrtumGCS -----LGLGHGERQNLSDMKGVITC-----SLDASDRFYTKVRAV-PETAKF-----FSSEAH-----HHAQSMQLKHSRIASQTFNEDYTN-----AVTAIGRTHARLGLPERWYI-----GGYALMLDGIKAVIESMWP-----RGLLAKGSDRVDKLSATIKAAILLMDYISIVYL-----  
Azotobacter vinelandii Gammaproteobacteria gi|23104391|ZP\_00090857 472aa (23)  
>AzovinGCS -----LLLGQFPAPVVAQIRELATT-----HQSELPGYFYQMLQDE-QAML-----FLTHE-----QVKSRLHGTLRQWVSVFSMSDDAALQ-----ALIAQKQIGIEHARIKIP IHLVL-----RGARHLRERFLVLLRESDI-----PRQRKLFQRLISETVDLAMEIMSRAFSDAY-----  
Bacillus anthracis Firmicutes gi|30265443|BA5673 434aa (42)  
>BacantGCS -----LHISKEDLQIVKVLQPFYIE-----EIDWITEKFSYNIQK-PNLITI-----IERYSS-----IPKIKQTLKTHIKELFSGDMH-----EDFIEQRVIAKRRHVQIGLHRKW-Y-----TAAYQELFRS IMKILKQV-----ESDFSYSINVKLFTLEQLVIAAYESKY-----  
Bacillus cereus Firmicutes gi:30023454|NP\_835085 434aa (42)  
>BaccerGCS -----LHISKEDLQIVKVLQPFYIE-----EIDWITEKFSYNIQK-PNLITI-----IERYSS-----IPKIKQTLKTHIKELFSGDMH-----ENFIEQRVIAKRRHVQIGLHRKW-Y-----TAAYQELFRS IMKILKTS-----YSAEFSYSINVKLFTLEQLVIAAYESEY-----  
Bacillus halodurans Firmicutes gi|15613068|NP\_241371 441aa (44)  
>BachalGCS -----IHLTDLDDLRKMKALQPLVE-----NMEVLADAFYSNIQK-PNLNEI-----IETHSS-----VERLKETLKHQILEMFGNEID-----QAFIQKRLQIAQAHVIRGLQTKW-Y-----VSAFQQLTDSLITQLLEQSSD-----YSAEIVLARSLLKLNLEQQVLVEAYENKR-----  
Bacillus thuringiensis Firmicutes gi|49481265|YP\_039413 433aa (41)  
>BacthuGCS -----LHISKEDLQIVKVLQPFYIE-----EIDWITEKFSYNIQK-PNLITI-----IERYSS-----IPKIKQTLKTHIKELFSGDMH-----EDFIEQRVIAKRRHVQIGLHRKW-Y-----TAAYQELFRS IMKILKQIT-----TIDDFSYSINVKLFTLEQLVIAAYESEY-----  
Bordetella bronchiseptica Betaproteobacteria gi|33600945|NP\_888505 475aa (13)  
>BorbroGCS -----DTCAHSPHEWAAARNVVTA-----NKAALADYFYECMLAD-PNAAF-----FLS-----DQLVKTKLHASMQDWLESVYAAAPTEEY-----ERTVAFQKRVGEVHARIDIPVHL-V-----MRGACALIRRICELLDORAS-----LSAAQAAATCRYVADVTMTAVEMMCHAYSVSHD-----  
Bordetella pertussis Betaproteobacteria gi|33594381|NP\_882025 475aa (69)  
>BorperGCS -----DTCAHSPHEWAAARNVVTA-----NKAALADYFYECMLAD-PNAAF-----FLS-----DQLVKTKLHASMQDWLESVYAAAPTEEY-----ERTVAFQKRVGEVHARIDIPVHL-V-----TRGACALIRRICELLDORAS-----KDPKRAAATCRYVADVTMTAVEMMCHAYSVSHD-----  
Burkholderia fungorum Betaproteobacteria gi|22984913|ZP\_00030046 724aa (22)  
>BurfunGCS -----HLYSQARASALTSLETVLRH-----NAVEIVKRFYDGLIRL-PKSKHT-----LAA-----LSEHELQHLKQIQNLALASPDLT-----AMDHRTMALRVGRHIAVIGLEWEDLI-----RSRGLLSAAIHDTLDTTVHGIAL-----AVLGRRLTQDLAWQTEAYQRLQTSRQDVLMRV-----  
Carboxydothermus hydrogenoformans Firmicutes TIGR246194|CONTIG:4013 251aa (17)  
>CarhydGCS -----LNLTAEDLQMAEFKELFIQ-----KAQEVNFKYQHLTKF-PYLQEL-----IKK-----HSTVEKLSKQAEYFISLTSEKID-----ADYIKNRLVAGKHMEDIAIYPNWYI-----GAYRLYEVVGVGLVARKYS-----PGTELYFKAQVAFYKRNIFDIQIATENYI-----  
Caulobacter crescentus Alphaproteobacteria GI|16124683|NP\_419247 537aa (17)  
>CaucrelGCS -----MGIDDKARSALRDLRPIR-----AEIGKALDNFYKVRAT-PETKRF-----FSD-----DRHMNAASSRQAHWGVIAEGQFS-----DDYQAVRAIGQTHARIGLEPRWYI-----GGYAVGDHLVRAVIDSELK-----GLFMEKAKKAGEAVALMKAIFLDMDFAIISYLETLE-----



Caulobacter crescentus Alphaproteobacteria GI|16126556|NP\_421120 555aa (55)  
>Caucres2GCS  
-----MRFDESRRAHLRAIKPVID-----AEIGALGFQYSQVRLP-PDTRVK---FRD-----DGHMAGAERAQAHHWRIAEEAGY-----ESYVRDVERIGRSHADADIAPQWYI-----GGYAVVVEVMRALVAKRAK-GLFNSAKSDAELADGLSALIKAAFLMDLMSVSTYIDVLL  
Chromobacterium violaceum Betaproteobacteria gi|34495694|NP\_899909 375aa (25)  
>Chrvi01GCS  
-----FALAPREMLLRAAGNLVSES-----HLSEELVTRFVYELQTS-PEIALI---IGDA-----DTLQLRSLAQRYYVVDLFSGIY-----DLEYVNRILRIGLVHVKRIGVEPK-L-----YLAADVSLKFLAEKLE-LIPDAEVRHLTLQALDKLMMFDVALVFETVYIRSLVAIE  
Chromobacterium violaceum Betaproteobacteria gi|34496333|NP\_900548 295aa (15)  
>Chrvi02GCS  
-----FAIQEDDLKRVRAAGEAVLP-----RLDEAMDRFYEWLP-PEYEG-L-FARP-----SALRNAREAAQAYRVSFFSGVV-----DAAYLAERVCAGETHARIGLP-----L-----SSYFAGVNYAFTLFCYGLKS-----GSRETASQTLSTAKLHMDTALVETYSRL  
Desulfitobacterium hafniense Firmicutes gi|23118817|ZP\_00102172 157aa (15)  
>DeshafGCS  
-----LKLEQDQLLLKKEFKPVMEQ-----DVDQIVDQFYAHTIKI-SQLNGI---IKEF-----SSVERLRGLQRNYLLSIFPDVI-----DEGYIMSRIRIGDVHVKRINLPFFVYL-----SSYQTFDDLPRIFAHYR-----KKPEQALRSLAVLRIFSFDDQVVMASYI  
Desulfotalea psychrophila Deltaproteobacteria gi|51244053|YP\_063937 363aa (24)  
>DesspyGCS  
-----LFFTDDEQVQLVSLKEVVSE-----NIEEIVFAFYRIVPFD-EMDGV---IGDA-----ETLRRLKKNYQSYIKTLFAGQY-----DEEYVHSRLRVGVVHVKRIG-----V-----EPKFYISAIHTLLTILREIIT-----KNSSNDCCQACVRLRAVEKIIMFDLSLTFDITYINSL  
Erwinia carotovora Deltaproteobacteria gi|50120615|YP\_049782 442aa  
>ErwcarGCS  
-----MIATTSQGSFNLRRLTAVQ-----KASDFADEFYIMLKQ-Q-EASL---FLSS-----CQVHDLRLHSGMSKIADILTNTGDS-----LADLHNQKIKIGIHARIGIPVD-L-----VERGARRLKHWHYEHIAQVAD-----DKALCFDAMRFASISMDIAEIMSKTYSQSHDLAA  
Escherichia coli Gammaproteobacteria gi|15801648|NP\_287665 460aa (13)  
>Escco1GCS  
-----GLVEQADPPIRAKAAEIAVA-----HANYLSIEFYRIVRID-PHAE-----FLSN-----EQVERQLKSAMERWIINVLSAQVDD-----VERLIQIQHTVAEVHARIGIPVE-I-----VEMGFRVLKILYFVIFHAKC-----EKARKLQVYHFSINSIDIAMEVMTRAFT  
Exiguobacterium Firmicutes gi|45532973|ZP\_00183969 430aa (37)  
>Exigu01GCS  
-----IDLTVEDLQIVRLRHVDVAE-----WMPQMDAFYAEVLVR-PELKQL---IERH-----STLERLKGTLAKHLIQMDFQV-----TPDYINVRKRIADHRVIRIGLQNKWYI-----AAFQKVLNLSRQIEDSTLPES-----EQVRVRSAGKFLNLEQQIVLWTEYEMVAERQTV  
Exiguobacterium Firmicutes gi|46113120|ZP\_00182337 425aa (30)  
>Exigu02GCS  
-----MGYTEHLQTLKAMAPVNS-----ILDEVLEQVLDHLLH-PEMVQI---AQTS-----STRELRKLVFADFVGSLLTGNM-----DDKFLAMRTRMGTKHNRNFPVTFWI-----ASYAFAFNTLLIPKIVEHFQHEPA-----QLTNAIHALNHNLDQAIVTSQVVDAR  
Geobacter metallireducens Deltaproteobacteria gi|48844286|ZP\_00298606 300aa (11)  
>GeometGCS  
-----YLFGEDEAETLKSLLSIAQA-----NRELMIEDFYDLLGI-PETAA---FLQ-----DDTVLQRLKLSHGWFVNLFRGVY-----DNQYHDLQRGVHVHVKIGLNAHF-V-----NAAMQKVRVFAVGMIRENFPDRD-----ERRKTEAVEKILDINLIMTASYIEELKKV  
Geobacter sulfurreducens Deltaproteobacteria gi|39998400|NP\_954351 300aa (11)  
>GeosulGCS  
-----YRFDEDAEILGSLFPLAET-----NKRERLADQFYDYLGI-PETAE---FLK-----EDLVLQKQLQTHQDWFVSLFAGSY-----DNRYIHNLKQIGHAHVAVRGLNAHY-V-----NVMNVVRAQFTLSIQHQLQSPSD-----RRQREAVEKILDINLIMSASYIEEMRRF  
Halocarula marismortui Euryarcheota gi|55229828|AAV45247 497aa (44)  
>HalmarGCS  
-----TGFDGSDVDNLTAMADETNA-----RAEAVDDFYDHLQSF-D-ETVEI---FGRS-----TKSVQDLKNTQYQLYLRDLVAGTY-----DKQVFNRAIRGKIHDMLDLPKIKYL-----GAYSIFYEHLRTIVEDLQSG-----DAARDEALEEMQSRALSIVFKLLNLDQ  
Halobacterium salinarum Euryarcheota gi|15790497|NP\_280321 489aa (39)  
>HalsalGCS  
-----TGIDDDTMAALAEQFLFEA-----TADALVTDFYDHLSEYE-RTQDL---FAN-----STKTVEQLKETAQAEYLLGLGRGEY-----DTEYAAQRARIGIHVDLGLGPDVYL-----GAYTRYTGLDALLADDVAD-----RGEAAAAVDELVARFLPMLKLLTFDQ  
Magnetococcus sp. MC-1 Unclassified proteobacteria gi|48832082|ZP\_00289126507 (20)  
>Magnet1GCS  
-----VGFTEKDAIILKLRPVAAK-----HATAVNTFYTRLSGFA-HLEKI---IGG-----AGSSVERLKRQTEEYLVQLDGEY-----GRDYFVRWRWIKQIHNKIGLEPDWYL-----GGYSYLQRQLLPIILLDKITTD-----DVQRAMAAIDKILDLSELAIGSYIDAV  
Magnetococcus sp. MC-1 Unclassified proteobacteria gi|22998615|ZP\_00042662 467aa (14)  
>Magnet2GCS  
-----DIYLVDAEKVNFVIGDLIKD-----RLNQTVRFYIELLESARFF---LDS-----ALVKERLHGSITELWQLMFSHKD-----DDTQMFQAKGNVHARINIPMLHV-----EGMRILRREIICFLSKYSPGTE-----LLVNDLVVLGEVLDHNLSLINESYVRNN  
Magnetospirillum magnetotacticum Alphaproteobacteria gi|23014982|ZP\_00054774 443aa (11)  
>Magspi1GCS  
-----LQIDEDTKRALREFREVLRSR-----HIDGVLDTFYRHVSNN-PATAKM---FAN-----PDRMAHARSQKHHMSEVFLGQ-----FDDRYFAQVTEIGKVHQRIQLDPKWYT-----AGYCFVLMNVIVAVEGSLYSYD-----ELTQVLAAVNKAFLMDLATSIVYIETNY  
Magnetospirillum magnetotacticum Alphaproteobacteria gi|23014248|ZP\_00054075 732aa (35)  
>Magspi2GCS  
-----LRLLDDAISTVKSVMQVSES-----SLPGIADGFYAHLMQW-PALKAL---LGG-----GAKIGHKQEQAHWASLFSGRF-----DDDYFTRAVAAIHAHERIGLEVNWYL-----GGYCFVLEKMAELAKLRSEA-----FPQAGAVLRAAFDMLDIASTYIEHGE  
Moorella thermoacetica Firmicutes gi|49235973|ZP\_00330036 245aa (13)  
>MootheGCS  
-----LTLSEAEGLMEAEKEIFIK-----EADAVKTFYDHLQY-PYLENM---IKQH-----STLERLTQTKAYISLTPAPI-----DGEYISGRLRIGKHKQKIGLYPKWYL-----GAYRIYSEIRRVINWHYHADDP-----DLCLRLLEAFTRKIFDMLAIENYI  
Novosphingobium aromaticivorans Alphaproteobacteria gi|48849793|ZP\_00304036 481aa (17)  
>NovaroGCS  
-----FNIDHKDFERFPHIAKVLN-----YAPPALDKLYDQIATP-PETASF---FGS-----RQAMRHARDKQIEHWAGMFSGRA-----DRSYFESAERIGNVHARIGLEPGWYI-----GGYAMVLEQVINAMFSGIGGIL-----GAKRTARSVGLVKMALLDMEVALSTYFAEE  
Rhodobacter sphaeroides Alphaproteobacteria gi|46192658|ZP\_00207372 341aa  
>RhosphGCS  
-----MN-----EAVGRALDRFHERMQT-SAAG---FFAD-----ATHMDSAKSRQARHWARLASGEI-----DAAYVEAVRGRTHARIGLEPFRWYL-----GGYALILEEIVQTMPLMRAGRGF-FGRRRAAALHALGYIVKALLDMDGVYSTYDVAQ  
Rhodospirillum rubrum Alphaproteobacteria gi|22966565|ZP\_00014161 442aa (11)  
>RhorubGCS  
-----LKADARLTEDLNEIHPMVS-----MIDDLGFEFYDTSRST-PELYAM---FGS-----AQSVRARLARQRHVVVFLKGD-----WKAHASQAQRKGAHVDRGITPS-I-----YFAAYSHVLCGLTGRMAQNFDP-----PEELARGLRAAIRAVDIMLAVLDVYFAEERDRAS  
Shigella flexneri Gammaproteobacteria gi|24113095|NP\_707605 381aa (13)  
>ShifleGCS  
-----GLVEQADPPIRAKAAEIALA-----HANYLSIEFYRIVRID-PHAE-----FLS-----NEQVERQLKSAMERWIINVLSAQV-----DDVERLIQIQHTVAEVHARIGIPVE-I-----VEMGFRVLKILYFVIFDASL-----SAAQKLQVYHFSINSIDIAMEVMTRAFT  
Silicibacter sp. TM104 Alphaproteobacteria gi|52011617|ZP\_00338974 308aa (25)  
>Silici1GCS  
-----FOITPADQERVRSIAPLADH-----VGEETIADFYAHILRFE-DAQQ---FAD-----DTQIERVKRQKQKYFQELINAEI-----DESYAERKRIGGHERAGITPTLYV-----GSYAYLQRLSQSILENGKE-----DPHKFLGLVLSMMKIAHYDMALAEITYV  
Silicibacter sp. TM104 Alphaproteobacteria gi|52008958|ZP\_00336325 485aa (11)  
>Silici2GCS  
-----YDLGNAQALLQKRAKMLG-----LILPELDHYDVRVGRE-PEMAAF---FKT-----EAMMERAKGEQLQHSRSLSGDF-----GEDYIQSARNIGRVHTRIGLPS-FF-----NAGYAHANAHIQALLKRRSG-GLMRRATETHALLGVLRSAMALDQLIFDAHAEMQ  
Silicibacter sp. TM104 Alphaproteobacteria gi|52008710|ZP\_00336080 487aa (12)  
>Silici3GCS  
-----FCLGEEDRSSIVGMAPLVER-----HIDAVLDDFYDLCLSR-PETKGY---FPT-----EQIVAHAAKAAQRAHWKLFSGRF-----DDSYMSSADKVGVRHFEVDLPFLFL-----GGYATVGDRLKVVLTQKNG-----WRGTAKRMQARALQRLILDFCERVIAGYIDAQL  
Sinorhizobium meliloti Alphaproteobacteria gi|15964389|NP\_384742 533aa (23) \*REMOVED INSERT YAERVKVLADTES  
>Sime1GCS  
-----AGLDEDACALLDRHQALSP-----RIELALRALSRLQAS-PDAARH---FDS-----RQIDRLHLQSGSHWNVLDARFDGLRMLGDP-----RWQIASHAVLHELILGAIEDAWP-----KSLISLGRARRERLDLV-----AALVRAAFVDEIAVSLRNLQRHQHQRQ  
Thermosynechococcus elongatus Cyanobacteria gi|22299532|ref NP\_682779 194aa (24)  
>TheoloGCS  
-----RVQLTDEKSLAEAPWKG-----EIAQPMADTFYDYLGRDE-EMNAI---INAT-----EGRIHLRHQFVDFVDFYEMFTGMS-WG---KAYARRWKIGLVHVRIG-----I-----GFQVVPAMAVVNAVQK-----LREANKSEALSALGKICMIDLAFIEQAY  
Thermus thermophilus Deinococcus/Thermus gi|46199407|YP\_005074 203aa (32)  
>TheheGCS  
-----RTGFTAEHAALLRELEGVMV-----PIAHEVALAFYDYLGRD-PELGAI---LHAE-----PGRVERLYRTFARWYGEVLSGVY-----DRAYARRRRRIGLVHARLG-----I-----GPRAMIPAMGIVQELSLEH-----MRMALRGHEVYSAVEAFKLVAMEVALIEESYL  
Vibrio vulnificus Gammaproteobacteria gi|27366532|NP\_762059 306aa (20)  
>VibvulGCS  
-----HDLTEADLALIRKFGQIMVP-----KLDEYVKHFYDNLNRT-PEYQY---F-----GDAQKLRQVDSQVRYWKTFFDARI-----DSAYLERRDVGEIHARVGLP-----L-----PTYFAGNMISWIFTKRMYD-----TVHGIAYSSLVTAFTKLLHLDITVDDYSRLI

Pgbs

Aeropyrum pernix Crenarcheota gi|14600601|NP\_147118 195aa (30)  
>AerperPgb

-----VMLGEKDVMLKACDVLK-----DQVDEILDWYGVASNE-HLIYV--FSNP-----DTGEPKIEYLERVRARFGAWILDTC--RDYNREWLDYQYEVGLRHRHSKKGVTDGV-----RTVPHIPRLRYLIAFIYIPITATI-KPFLAKKGGSPEDIEGMYNAWFKSVVLQVAIWSHPYTK-----  
Chloroflexus aurantiacus Chloroflexi gi|22974473|ZP00020712 227aa (63)  
>ChlaurPgb  
-----VLMFAEDEQLRMAGEVLC-----DQVDAILDWYGFVASH-AHLVYV--FTGS-----D-GQPIADYLSRVQRFGQWILDTCR--RPYDQDLWLNQMEIALRHRHTKKNQTDGV-----QSVFMIPLRMYIAFIYIPITATI-REFLARKGHSAAEVDRMHQAWFKSIVLQVTLWSYPYTR-----  
Rubrobacter xylanophilus Actinobacteria gi|46106825|ZP\_00200180 196aa (32)  
>RubxylPgb  
-----VLFTEDEEYIQRKAGEVLE-----GRLDELDDWYGFVASH-SHLVYV--FSSP-----E-GEPIQEYLERVRERFKRWILDACR--RPYDQEWLDYQYEQEIALRHTREKKNRTDGV-----EAPPEVSLRYMISFIYIPITATI-RPFLEEGGRPAEDVEKMHQAWFKAVVLHVTLWSQPYAR-----  
Methanosarcina acetivorans Euryarcheota gi|20091705|NF\_617780 195aa (31)  
>MetacePgb  
-----VMFTAEEDEYIQRKAGEVLE-----DQVEEILDWYGFVASH-PHLLYV--FTSP-----D-GTFPNEEYLAARVRFKRWILDTCN--RSYDQAWLDYQYEQEIALRHRHTKKNQTDNV-----ESVFNIGYRYLVAFIYIPITATI-KPFLARKGHTPEEVEKMYQAWFKATTLQVALWSYPYVK-----  
Methanosarcina barkeri Euryarcheota gi|48837815|ZP\_000294773195 197aa (31)  
>MetbarPgb  
-----VMFTEDEEYIQRKAGEVLE-----DQVEEILDWYGFVASH-PHLLYV--FTSP-----D-GTFPNEEYLAARVRFKRWILDTCN--RNYDQAWLDYQYEQEIALRHRHTKKNQTDNV-----ESVFNINRYLVAFIYIPITATI-KPFLARKGHTSEVEKMHQAWFKATVLQVALWSYPYVK-----  
Thermobifida fusca Actinobacteria gi|48836482|ZP\_00293478 197aa (33)  
>ThfusPgb  
-----VMFTSADEEALRMAGDVLE-----DQVEDVLDWYGFVADH-PHLLAY--FSTP-----D-GHPIQEYLDVRERFRFGQWILDTCR--RPYNQEWLDYQYEQEIALRHTPEKKNVTDNA-----NSVDNIPRLRYVIAFIYIPVTATI-RPFLAKKHSADQVEAMYQAWFKSVTMQIALWSQPYTR-----
