# Supplementary material
Source: PubMed Central journal article supplement (PMC1183549)

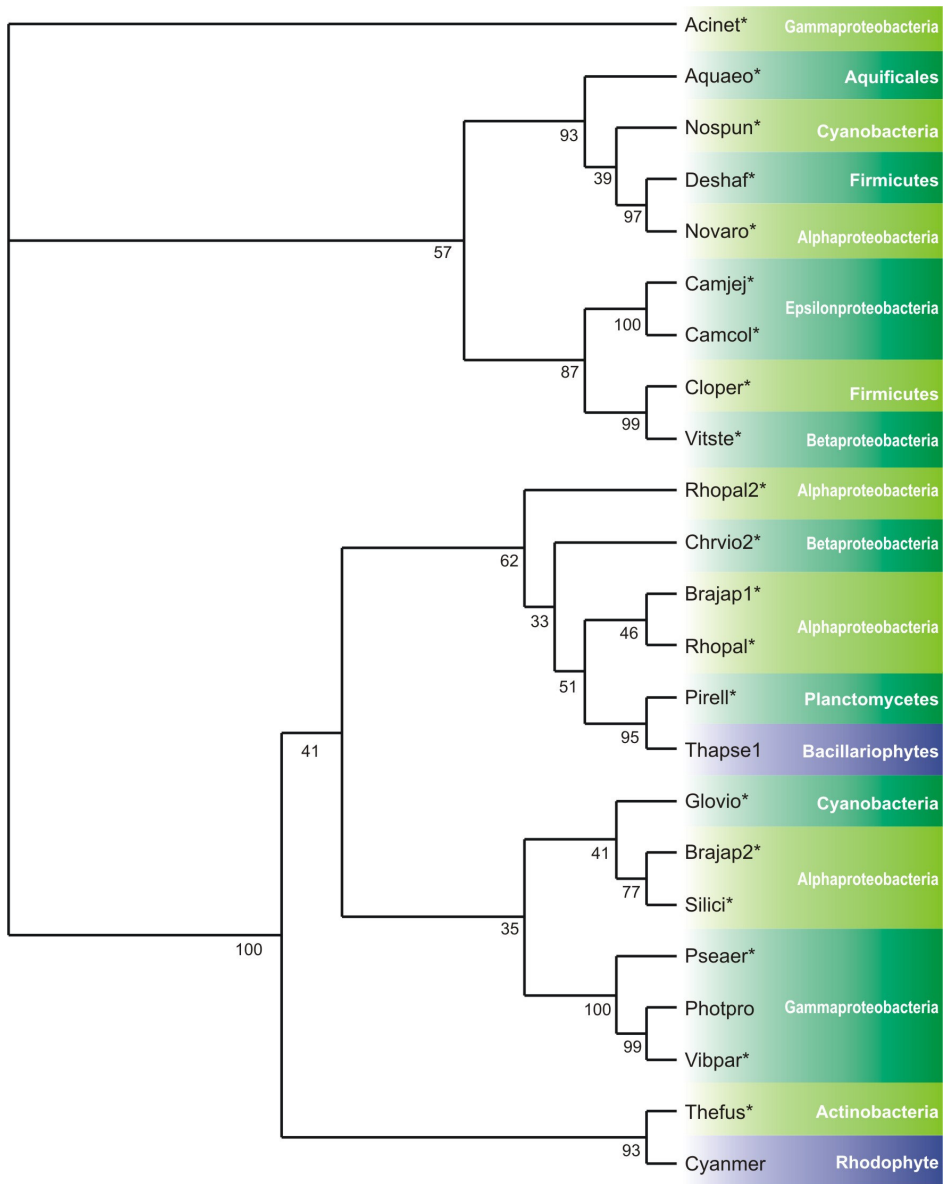

Supplement: pnas_0502103102_2.pdf [file pnas_0502103102_2.pdf]

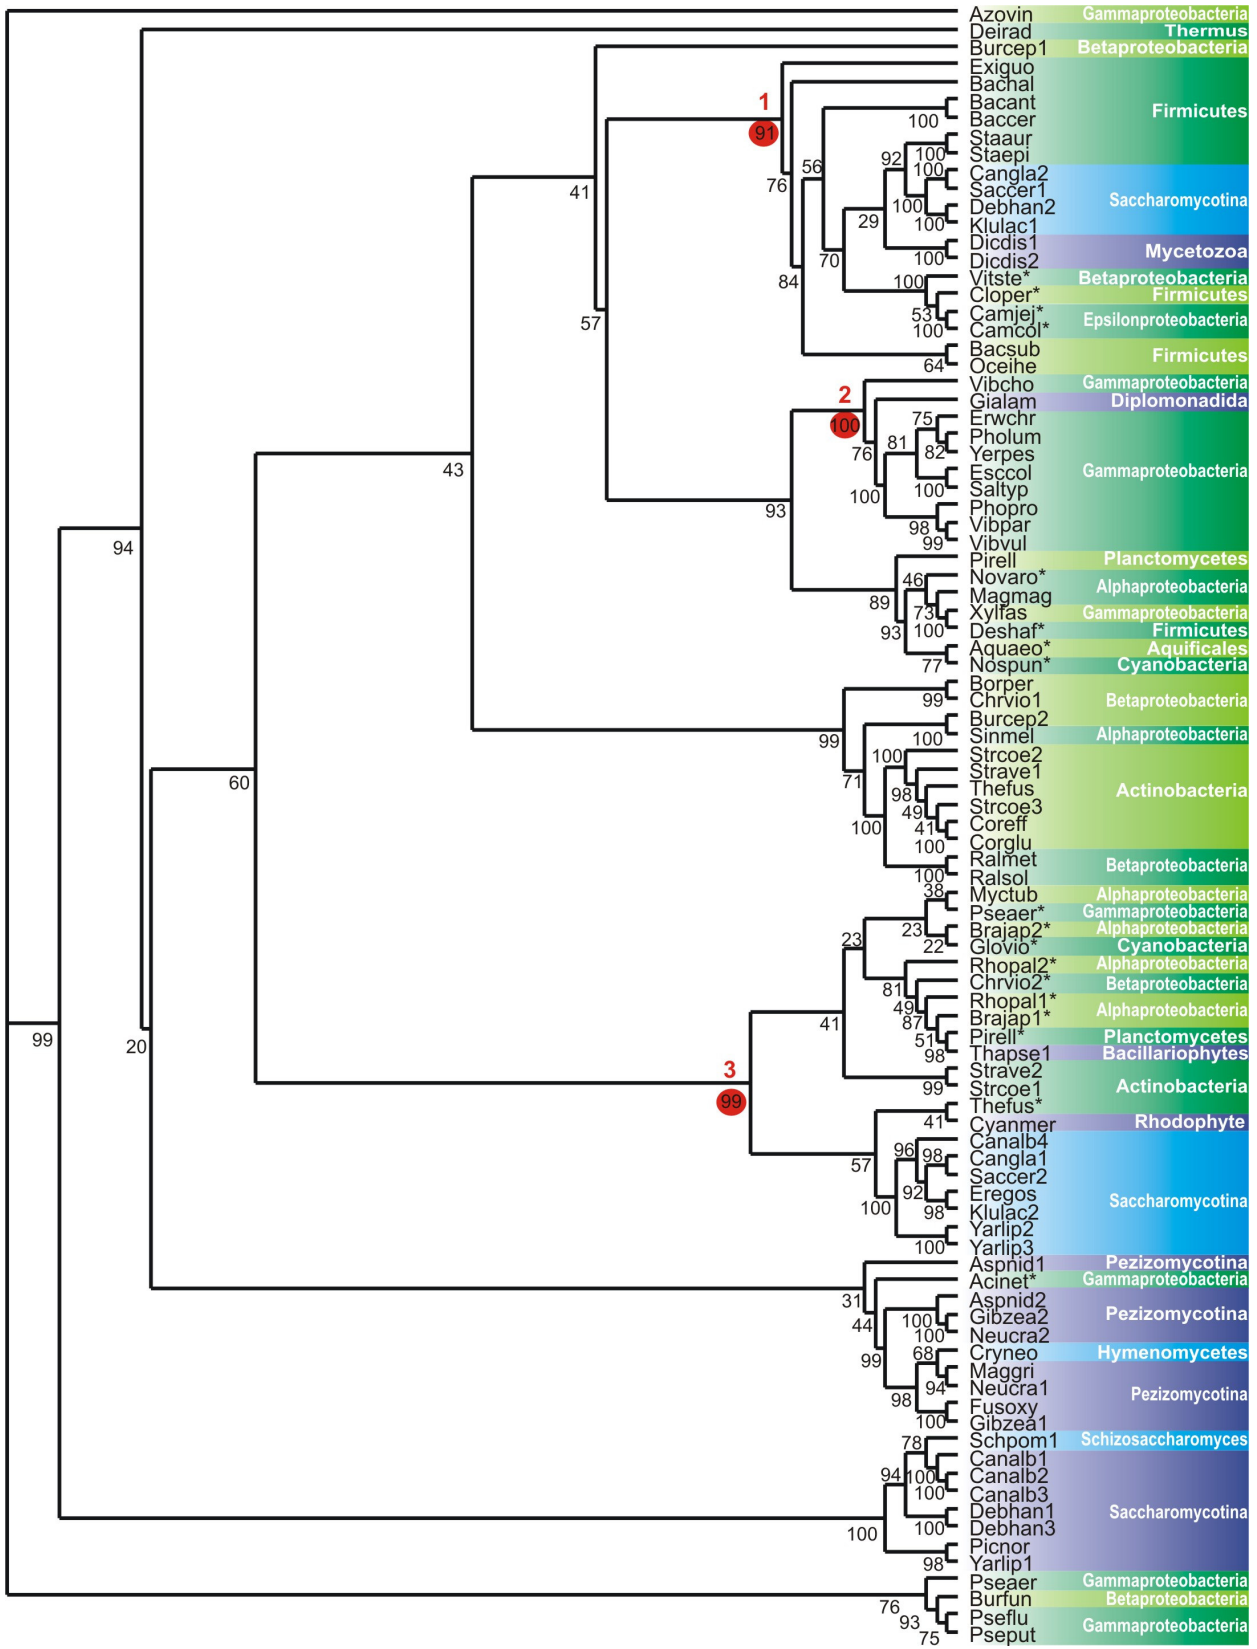

Supplement: pnas_0502103102_3.pdf [file pnas_0502103102_3.pdf]

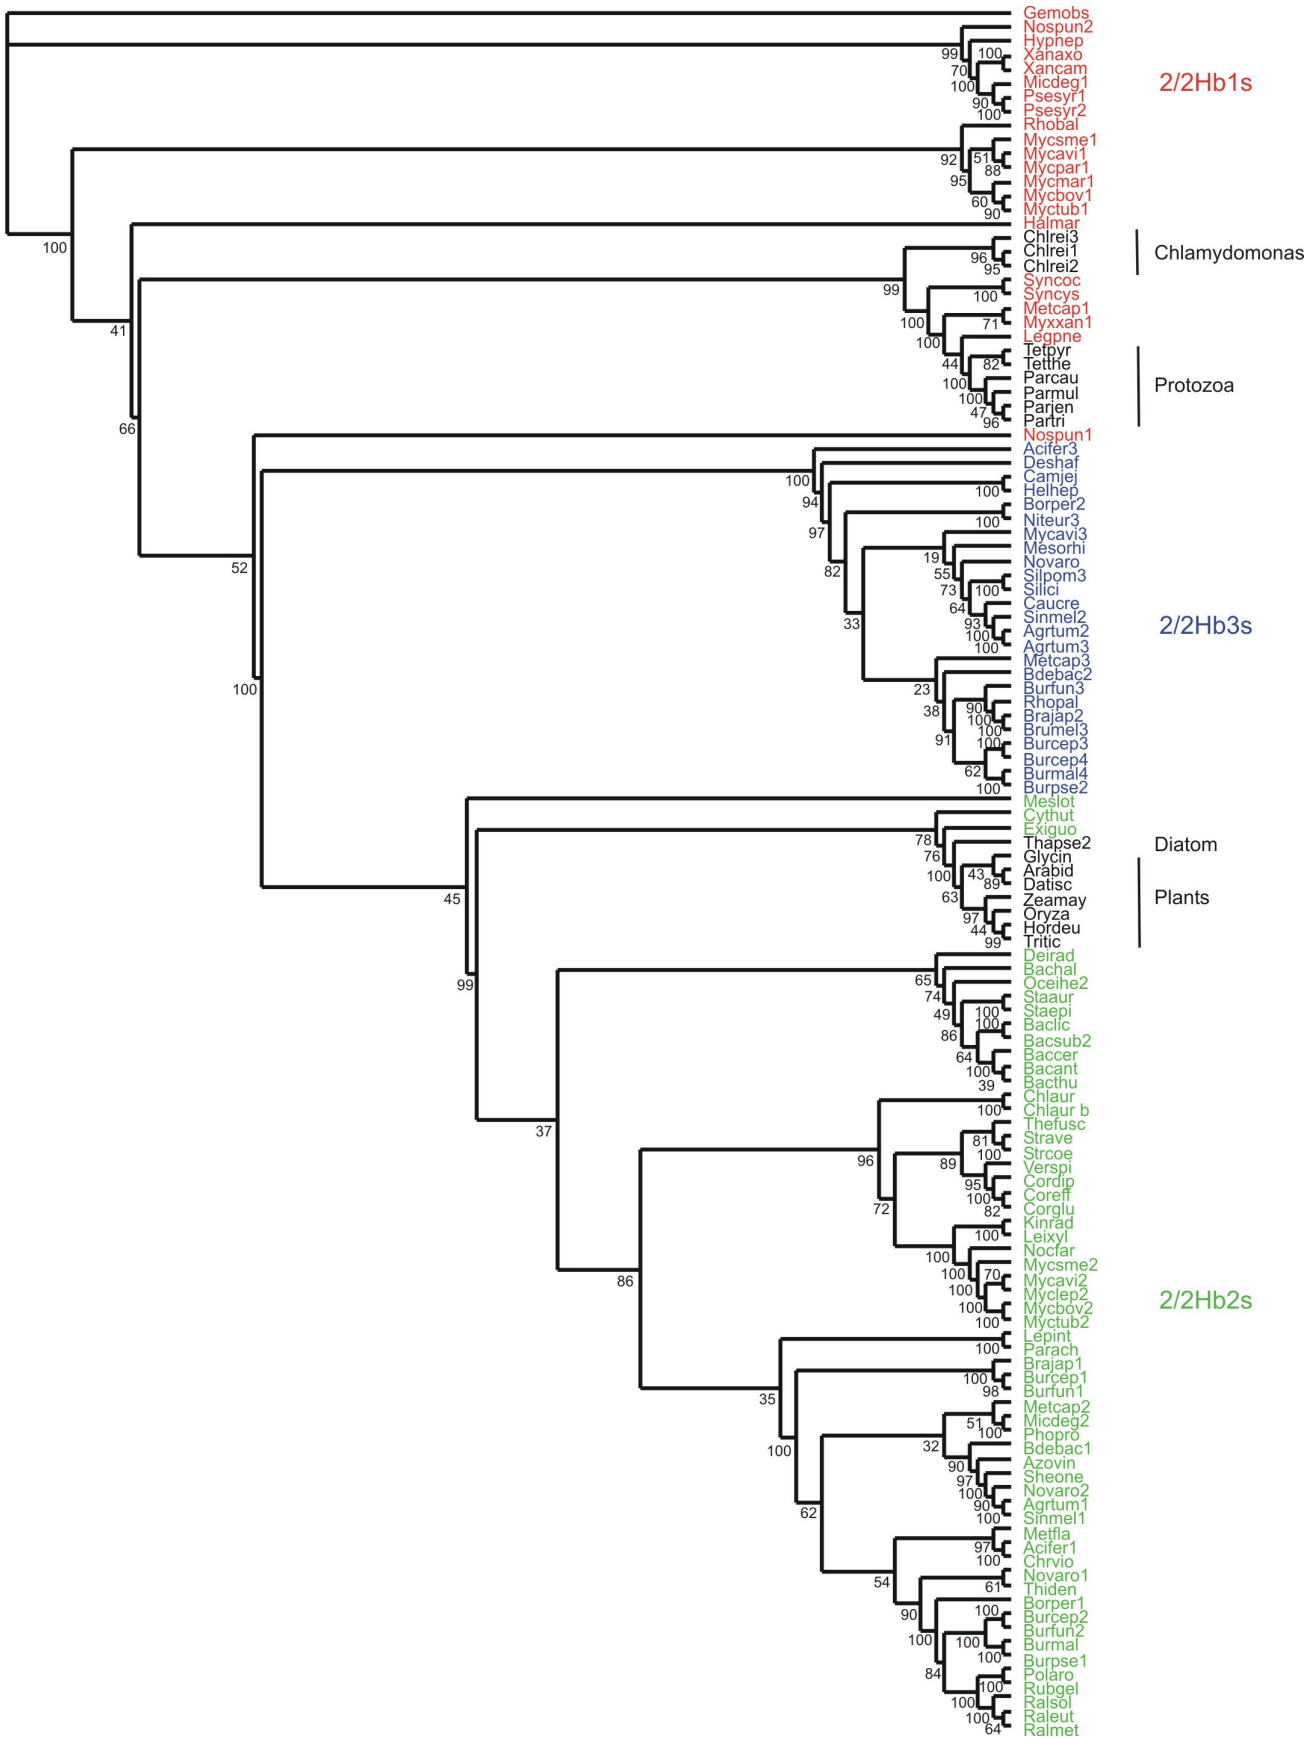

Supplement: pnas_0502103102_6.pdf [file pnas_0502103102_6.pdf]
